# Supplementary material for: High-resolution mapping, characterization, and optimization of autonomously replicating sequences in yeast
Source: HighWire-hosted journal article supplement (doi:10.1101/gr.144659.112), 2012-12-12
Supplement: Supp_Table1.xlsx [file Supp_Table1.xlsx]

## Sheet: all_720_arsseq_fragments_cnt_gt
Supplementary Table 1 - List of ARSseq fragments post-filtering
chr	start	end	read_depth	flanking_site
1	496	904	7846	GGCC
1	517	893	4316	GTAC
1	30603	31609	2796	GATC
1	30737	31472	64	GTAC
1	41494	43060	56	GGCC
1	41857	42233	877	GTAC
1	69634	71027	190	AGCT
1	69817	70817	113	GTAC
1	124072	125283	1568	GGCC
1	124307	124626	592	GATC
1	147357	148026	26	AGCT
1	147370	147718	404	GTAC
1	147398	147833	1199	GATC
1	159546	160929	1205	GTAC
1	159795	160012	694	AGCT
1	175979	176452	194	GGCC
1	228920	229709	236	GGCC
1	229378	229689	2033	GTAC
2	65	360	1050	AGCT
2	6324	6941	298	GTAC
2	6441	7256	98	GGCC
2	27672	29312	2665	GGCC
2	28395	29138	1780	AGCT
2	28719	29195	552	GTAC
2	63122	63481	3236	AGCT
2	63136	64599	81	GATC
2	63205	63588	3291	GTAC
2	93126	93798	4978	GTAC
2	93331	93641	3	AGCT
2	142988	143986	8638	GATC
2	143140	143757	435	AGCT
2	143549	143988	1737	GTAC
2	152539	152907	151	GGCC
2	169813	170333	3295	GGCC
2	170010	170371	369	GTAC
2	197788	198609	14077	GGCC
2	208091	208340	20	AGCT
2	237276	238010	12018	GGCC
2	254266	255324	602	AGCT
2	254713	256081	3	GGCC
2	254931	255213	2510	GTAC
2	325053	326528	595	GTAC
2	407393	408032	36237	GTAC
2	407414	408113	1278	GGCC
2	407481	408543	7836	GATC
2	486586	487163	5952	GGCC
2	486682	486886	2234	AGCT
2	486764	487072	46	GATC
2	486817	487039	3	GTAC
2	517116	517412	735	GATC
2	590405	591707	208	GGCC
2	590818	591615	3266	GTAC
2	621833	623240	83	GGCC
2	704257	704719	13452	GTAC
2	740800	742101	11	GGCC
2	741238	742400	14846	AGCT
2	741586	741837	2286	GATC
2	791521	792300	6925	GATC
2	792074	792489	235	AGCT
2	801077	802818	4	GGCC
2	802089	802674	82	AGCT
3	814	1296	11726	GTAC
3	10493	11358	36	GGCC
3	10844	11700	3863	AGCT
3	11199	11345	2847	GTAC
3	13802	15620	4	GGCC
3	39401	40142	263	GGCC
3	39458	39824	86	GTAC
3	39507	40124	8005	AGCT
3	74152	74681	5	GATC
3	107625	109471	9	GGCC
3	108377	109569	727	GTAC
3	108722	109056	1744	AGCT
3	131693	132777	2026	GATC
3	166487	166713	624	GTAC
3	166630	166775	391	AGCT
3	193821	195124	13	GGCC
3	194080	194362	1788	GTAC
3	194214	194635	27674	AGCT
3	196871	199042	143	GGCC
3	224444	225612	1279	GGCC
3	224646	225357	20224	AGCT
3	224672	225056	350	GTAC
3	272565	274042	54	GGCC
3	272863	273122	19	GTAC
3	292440	292827	484	GTAC
3	292496	292786	37078	AGCT
3	294483	295486	652	GGCC
3	294547	294915	6	AGCT
3	294711	295524	85311	GATC
3	311462	311809	17	GGCC
3	314712	315943	1105	GGCC
3	314855	316232	18	GATC
3	315768	316060	56469	GTAC
4	736	2433	3	GGCC
4	44684	46449	6	GTAC
4	45891	46316	12527	GGCC
4	46048	46610	5535	AGCT
4	85364	86920	8	GGCC
4	85642	86573	4214	GTAC
4	123363	123978	1170	GGCC
4	123383	124077	3266	AGCT
4	123424	124386	1322	GTAC
4	137330	137826	30	GGCC
4	137471	138547	40	GTAC
4	212307	213422	151	GGCC
4	212461	213074	4441	GTAC
4	212517	213270	131	GATC
4	253187	254159	374	GGCC
4	253388	253997	1018	AGCT
4	253744	254236	27676	GATC
4	316769	317229	1395	GGCC
4	329229	329974	12636	AGCT
4	407548	409078	244	GGCC
4	407898	408325	78	AGCT
4	434323	435555	11	GGCC
4	434966	435316	85	GTAC
4	452766	452885	3603	GTAC
4	461696	462661	1773	GTAC
4	462370	462809	13	AGCT
4	464709	466496	6	GGCC
4	483577	484335	5714	GGCC
4	483934	484272	8859	GTAC
4	483985	484081	485	GATC
4	504677	506334	46	AGCT
4	505146	505689	23	GGCC
4	505226	505896	637	GTAC
4	554614	555639	8793	AGCT
4	554614	556337	181	AGCT
4	554745	555441	4104	GATC
4	566307	567798	21	GTAC
4	566792	567919	5	GGCC
4	567471	567861	3263	GATC
4	567545	568679	20	AGCT
4	628930	629575	897	GTAC
4	639520	640223	670	GTAC
4	639949	640295	10828	AGCT
4	702230	703493	3599	GATC
4	702462	703063	1497	GTAC
4	702849	703117	3413	AGCT
4	748332	748692	95	AGCT
4	752394	753760	221	GATC
4	752917	754062	340	GGCC
4	752923	753777	21166	GTAC
4	806041	806326	2021	GGCC
4	913666	914921	5778	GGCC
4	913717	914034	32178	AGCT
4	920991	922621	30	AGCT
4	921676	922139	15843	GTAC
4	951169	951307	22	GATC
4	1016378	1017760	37	GGCC
4	1016627	1016902	7	AGCT
4	1016660	1017007	4	GTAC
4	1056880	1058678	177	GGCC
4	1057491	1058040	442	GTAC
4	1057551	1058292	3843	AGCT
4	1109227	1110664	200	GGCC
4	1109532	1110537	7651	AGCT
4	1165803	1166576	18054	AGCT
4	1166019	1166829	430	GTAC
4	1240022	1241094	136	GGCC
4	1240256	1241374	3483	GATC
4	1240308	1242131	5	AGCT
4	1302145	1302883	428	GTAC
4	1302299	1302779	59	GGCC
4	1302383	1303194	8387	AGCT
4	1353486	1354101	5073	AGCT
4	1384796	1385602	509	AGCT
4	1384894	1385592	1207	GGCC
4	1446075	1447889	773	GGCC
4	1447361	1447628	373	AGCT
4	1447371	1448737	30	GTAC
4	1461229	1462207	955	GTAC
4	1502145	1504025	5	GGCC
4	1523950	1524774	4032	GGCC
4	1524271	1524889	1769	GTAC
5	5844	6796	11279	AGCT
5	5982	6673	29941	GGCC
5	6238	6784	325	GTAC
5	59084	59998	185	AGCT
5	59122	59884	46434	GATC
5	70087	70198	100	GGCC
5	93402	94199	210	GGCC
5	93923	94748	1280	GTAC
5	93965	94343	1706	GATC
5	94052	94271	15	AGCT
5	145071	145954	2201	GGCC
5	145352	145839	8024	GTAC
5	145676	146072	2	AGCT
5	173183	174135	5879	GTAC
5	173620	174291	3	GATC
5	173671	173819	30	AGCT
5	212091	213119	555	AGCT
5	286720	287648	133	GGCC
5	287293	287660	57959	GATC
5	287474	287635	505	AGCT
5	316195	317309	2	GGCC
5	352874	353680	460	GTAC
5	353507	354259	640	GGCC
5	406114	407729	2	GGCC
5	406176	407580	112	GTAC
5	406801	407097	296	AGCT
5	438921	439263	1568	GGCC
5	489765	490089	774	GATC
5	497871	500059	13	GGCC
5	497890	499177	283	GTAC
5	498878	499397	1645	AGCT
5	548788	549855	3242	GTAC
5	548991	550207	896	GGCC
5	569221	571019	61	AGCT
5	569227	569762	24162	GGCC
5	569504	569877	28334	GTAC
6	5247	5625	974	GTAC
6	5362	5730	55	GGCC
6	20064	21845	28	GTAC
6	20155	21205	801	GGCC
6	20572	21438	1992	AGCT
6	67605	69282	22	GGCC
6	68287	69202	4745	AGCT
6	68719	68908	1941	GATC
6	86148	86477	2	GTAC
6	117752	118882	73	GGCC
6	167490	167794	11	GATC
6	167539	167998	1395	AGCT
6	199333	199549	71	GTAC
6	199395	200294	2511	AGCT
6	255622	256457	24	GGCC
6	256122	256469	5855	GTAC
6	268770	270076	319	GTAC
6	269088	269968	172	GGCC
7	497	946	7349	GTAC
7	613	1712	795	GGCC
7	1798	3110	71	GATC
7	2032	2820	917	AGCT
7	17554	18235	4679	AGCT
7	17843	18064	1390	GTAC
7	55424	55926	52	GGCC
7	63755	65025	1724	GTAC
7	64302	64591	384	AGCT
7	92735	92866	176	GGCC
7	111182	112374	129	GTAC
7	162947	163418	1109	AGCT
7	163065	163554	19166	GTAC
7	203169	205002	4	GTAC
7	240898	241399	1924	AGCT
7	250463	251273	10	GGCC
7	285708	286108	5108	GTAC
7	285763	286141	35095	GATC
7	285919	286294	955	AGCT
7	303700	303822	13	GGCC
7	313541	314182	19	GTAC
7	352760	352907	310	GTAC
7	388552	389227	328	GATC
7	388571	389112	796	GGCC
7	420322	421647	34	GGCC
7	420999	421515	18809	GTAC
7	481343	481526	50	GTAC
7	483895	485229	189	GGCC
7	484840	486912	8	GTAC
7	484882	485157	3893	AGCT
7	508473	509169	45	GGCC
7	508731	510247	1799	GTAC
7	574181	575150	6953	GTAC
7	574583	574920	1497	AGCT
7	653489	654244	420	GGCC
7	658675	660121	298	GGCC
7	659453	660101	9333	AGCT
7	659656	661193	607	GTAC
7	714811	715781	4303	AGCT
7	714989	715463	2195	GTAC
7	777687	778329	1286	GTAC
7	833918	835373	284	GGCC
7	834513	835031	1318	AGCT
7	887884	888647	13132	GTAC
7	888303	888605	1272	AGCT
7	929848	930979	24	GGCC
7	977471	978132	5494	GGCC
7	977574	978037	6380	AGCT
7	977756	978149	1519	GTAC
7	998558	999634	4428	AGCT
7	999386	999919	6410	GTAC
7	1062308	1063664	3564	GATC
7	1063243	1063708	3766	AGCT
7	1083157	1085077	5	AGCT
7	1083328	1083767	293	GTAC
7	1083439	1083806	1558	GGCC
7	1083439	1084915	2	GGCC
8	5220	5599	486	GTAC
8	5336	5704	54	GGCC
8	7489	8018	4265	AGCT
8	7520	8365	3	GGCC
8	45571	46643	5796	GGCC
8	45574	45998	4315	GATC
8	45595	45936	7566	AGCT
8	63408	64906	335	GTAC
8	63678	64554	14369	AGCT
8	63871	64834	2179	GGCC
8	66458	66657	2088	GTAC
8	133253	134176	589	GTAC
8	133367	133620	2977	AGCT
8	168076	169101	276	GGCC
8	168188	168755	4480	AGCT
8	168539	168714	1120	GTAC
8	244370	246029	11	GGCC
8	245615	246706	1951	GTAC
8	245718	245878	417	GATC
8	296516	297411	3135	AGCT
8	296947	297388	13933	GATC
8	297067	297821	22552	GTAC
8	391080	392396	159	GGCC
8	391687	392663	270	AGCT
8	392180	392974	140	GATC
8	447628	448313	614	GTAC
8	447659	447859	4248	AGCT
8	449847	450500	2	GTAC
8	501421	502300	4205	AGCT
8	501830	502400	1614	GTAC
8	519313	521029	26	GGCC
8	555575	556268	5226	GGCC
8	555797	556385	27203	GTAC
9	7616	8436	652	GGCC
9	32527	33856	11251	GGCC
9	33265	33815	25819	AGCT
9	33292	33626	589	GTAC
9	73182	73993	112	AGCT
9	73443	74482	327	GGCC
9	73784	74384	471	GTAC
9	79614	80860	6	GATC
9	105115	106072	2	GGCC
9	105859	106053	31	GTAC
9	105869	106271	22	GATC
9	135578	136869	404	AGCT
9	175029	175398	3097	AGCT
9	175161	175459	3126	GATC
9	214359	214931	827	GGCC
9	214411	215397	32596	GTAC
9	214696	215727	471	AGCT
9	244680	245981	100	AGCT
9	245500	246766	4515	GGCC
9	245752	245922	8	GTAC
9	247012	248184	2590	GATC
9	247128	248856	156	GGCC
9	247660	247888	82	AGCT
9	309761	309996	145	AGCT
9	310343	311173	689	GATC
9	340699	342200	854	GGCC
9	341245	342623	859	GATC
9	341472	342108	11044	GTAC
9	356951	358962	8	GGCC
9	411701	412194	27678	AGCT
9	411725	412589	339	GGCC
9	411831	412287	437	GTAC
9	438587	439276	971	AGCT
9	438620	439369	63052	GGCC
9	439007	439319	9048	GTAC
10	7599	8419	539	GGCC
10	23782	24435	9577	GGCC
10	53172	53361	121	AGCT
10	67318	68663	3	GGCC
10	67482	68004	48374	GTAC
10	98971	100182	1296	GATC
10	99175	99734	2090	GGCC
10	99200	100023	190	GTAC
10	113186	114102	39	AGCT
10	113423	114181	8267	GATC
10	113543	115514	3	GGCC
10	113628	113772	5412	GTAC
10	120652	121237	20	GGCC
10	160353	161851	40	GGCC
10	166956	167071	3857	GATC
10	203010	204514	159	GGCC
10	203882	204306	67	AGCT
10	227727	229324	10	GTAC
10	298676	298941	516	GTAC
10	336475	337288	28845	GATC
10	336496	337194	38179	GGCC
10	336720	337855	2411	GTAC
10	374144	376006	218	GATC
10	374393	374914	14152	GGCC
10	374492	374797	229	GTAC
10	411589	412027	107	GATC
10	416182	417797	58	GATC
10	416950	417179	12403	AGCT
10	442014	442580	624	GTAC
10	442021	442839	2832	GGCC
10	442287	442646	1805	AGCT
10	458455	459742	37	GGCC
10	539821	540865	5010	GTAC
10	540084	540578	23013	AGCT
10	612577	612979	5249	AGCT
10	622922	623129	2393	GTAC
10	653046	654380	709	GTAC
10	653429	654279	73	GATC
10	653704	654256	31	GGCC
10	653979	654502	766	AGCT
10	664749	665022	205	AGCT
10	683043	684125	2017	GATC
10	683594	683908	830	GTAC
10	710803	711988	87	GTAC
10	743063	744765	35	GGCC
10	744503	744881	956	GTAC
11	506	1457	14147	GGCC
11	526	898	7132	GTAC
11	55285	56259	251762	GATC
11	55362	56095	14439	GGCC
11	55621	56319	13603	GTAC
11	97731	98661	9937	AGCT
11	98340	98530	3518	GTAC
11	151996	154007	5	AGCT
11	152737	154273	3425	GATC
11	152979	153963	3952	GTAC
11	153053	153517	48	GGCC
11	154270	154496	225	GATC
11	195249	196514	26	GTAC
11	212938	213630	54	AGCT
11	213221	213486	25	GTAC
11	256856	257658	19	AGCT
11	257046	258306	445	GATC
11	257534	258001	2784	GTAC
11	301898	302737	155	GTAC
11	329121	329641	5169	AGCT
11	329137	329814	4654	GTAC
11	388521	388798	2259	AGCT
11	388592	389376	8805	GTAC
11	416733	417609	1788	AGCT
11	446704	448487	40	GGCC
11	456966	457051	10086	GATC
11	516343	517088	3715	GATC
11	516465	517897	17	GGCC
11	581205	581758	291	AGCT
11	581220	582063	12485	GGCC
11	581234	581942	752	GTAC
11	611831	613538	29	GTAC
11	611992	612480	54233	AGCT
11	633598	633974	44	AGCT
11	633676	633913	58	GGCC
11	642036	642740	1985	GGCC
11	642297	642631	1567	GTAC
11	664721	665700	1981	GGCC
11	665191	665817	25708	GTAC
12	219	594	6	GTAC
12	11152	12734	35	GGCC
12	11801	12664	1870	GTAC
12	27506	27572	2	GGCC
12	31311	31849	11806	AGCT
12	31337	32014	1343	GTAC
12	76723	77002	358	GTAC
12	90615	91685	98	GTAC
12	91065	92622	60	GGCC
12	91462	92260	25	AGCT
12	139564	139946	9	GTAC
12	156354	156878	434	AGCT
12	221823	222738	659	AGCT
12	222220	222677	175	GGCC
12	230444	232487	8	GATC
12	230569	231866	946	AGCT
12	231039	232251	89	GGCC
12	231187	232915	95	GTAC
12	243196	244911	36	GTAC
12	243307	243967	3988	AGCT
12	243634	244941	9	GGCC
12	289188	289560	4335	GATC
12	289277	289511	377	GTAC
12	372861	373384	9687	AGCT
12	372897	374365	20	GGCC
12	372995	373733	1585	GTAC
12	412213	412894	9550	GGCC
12	412686	413409	1006	GTAC
12	450406	451611	73	GTAC
12	458468	459973	13	GTAC
12	511729	513582	31	GTAC
12	512562	513366	92490	AGCT
12	512863	514340	11166	GGCC
12	601836	603392	202	GGCC
12	602894	603362	14174	GATC
12	602934	603146	323	AGCT
12	603714	604074	2	GATC
12	622724	623216	267	GTAC
12	659393	660224	635	GGCC
12	659615	659959	128	GTAC
12	659778	660314	49526	AGCT
12	678303	678452	2	GTAC
12	702851	703060	2	GTAC
12	729559	730981	252	GGCC
12	730429	731020	7322	GATC
12	730472	730992	27946	GTAC
12	744590	746295	429	GATC
12	793473	794411	60	GTAC
12	793806	794498	2815	AGCT
12	821277	823079	72	GTAC
12	821523	822888	20	GGCC
12	868023	868180	12	GTAC
12	888163	889035	2042	AGCT
12	888471	888784	1463	GTAC
12	927467	928930	105	GTAC
12	927699	929140	1386	GGCC
12	1006903	1007337	3958	GTAC
12	1013520	1014116	1600	AGCT
12	1013653	1014106	100	GGCC
12	1023296	1024371	223	GTAC
12	1023545	1024870	5946	AGCT
12	1023649	1024405	1504	GATC
12	1039236	1039925	75	GTAC
12	1059302	1059919	1967	AGCT
12	1059434	1059919	1366	AGCT
12	1063624	1064445	7142	GGCC
12	1064185	1065232	2275	GTAC
12	1070543	1071694	2	GGCC
13	31097	32059	112	GTAC
13	31473	32395	1082	GGCC
13	31615	32261	3116	AGCT
13	39779	40395	275	GGCC
13	93941	94862	585	AGCT
13	94250	94603	2	GTAC
13	136936	137598	13782	GTAC
13	137132	137694	412	GGCC
13	158185	159540	63819	AGCT
13	158886	159277	48	GATC
13	183100	184058	1321	AGCT
13	183325	183972	241	GATC
13	183411	183924	364	GGCC
13	183428	184037	508	GTAC
13	183731	183924	38896	GGCC
13	262219	264108	4	GGCC
13	285971	287581	1747	AGCT
13	286194	287010	1513	GATC
13	286231	287851	2682	GGCC
13	286830	287827	6966	GTAC
13	370760	371270	6081	AGCT
13	370800	371177	2280	GTAC
13	427744	427818	84	GGCC
13	432265	434240	62	GTAC
13	502775	503904	1759	AGCT
13	503125	503844	106	GTAC
13	535428	536209	1319	GTAC
13	535469	536614	339	AGCT
13	554127	554666	89	GGCC
13	554357	555003	4109	GTAC
13	554388	554754	7435	GATC
13	610841	611717	1372	GTAC
13	610916	611462	597	AGCT
13	611173	611538	182	GGCC
13	611177	612240	515	GATC
13	633628	634668	171	GTAC
13	633970	634727	31593	GATC
13	633999	634930	264	GGCC
13	634068	634409	24	AGCT
13	634443	634617	471	AGCT
13	688728	689279	130	GTAC
13	758183	759124	1864	GGCC
13	758285	758607	1188	GTAC
13	771930	773082	86	GGCC
13	804027	805759	5	GGCC
13	804404	806055	16	GTAC
13	804803	805472	1357	AGCT
13	805154	805270	1255	GATC
13	814923	815759	5042	AGCT
13	815117	815832	383	GTAC
13	877933	879245	4	GGCC
13	878524	879318	419	GTAC
13	878664	879037	278	GATC
13	897357	898883	380	GGCC
13	897655	898689	3175	AGCT
13	897768	898258	4301	GTAC
13	902283	902393	172	AGCT
13	922361	923706	1002	GGCC
13	922941	923822	4647	GTAC
14	7260	8961	70	GGCC
14	27837	28788	433	AGCT
14	61617	61829	353	GTAC
14	89459	89830	45325	GTAC
14	89484	90232	165948	GATC
14	89566	90452	58825	GGCC
14	126266	127491	12	AGCT
14	169301	169752	2785	GTAC
14	169339	169949	368	AGCT
14	195802	196540	5187	GATC
14	195995	196460	373	GGCC
14	196031	196352	7385	AGCT
14	196076	196714	31563	GTAC
14	279226	280114	538	AGCT
14	279462	280667	301	GTAC
14	279778	280550	3312	GGCC
14	321058	322240	25	GGCC
14	321598	322338	1690	AGCT
14	352074	352942	353	GTAC
14	352494	353830	4430	GGCC
14	411917	412717	652	GGCC
14	448256	449883	142	AGCT
14	448970	449782	9355	GGCC
14	449182	449643	512	GTAC
14	498838	499394	1613	GTAC
14	545542	546238	1596	GTAC
14	546025	546374	5	AGCT
14	559776	561737	109	AGCT
14	561019	561677	30	GTAC
14	609269	609781	24564	GGCC
14	609463	609725	3096	GTAC
14	629682	629831	57	GGCC
14	635265	636081	787	AGCT
14	686525	686595	31833	GATC
14	691140	692778	1139	GGCC
14	691375	691733	1560	AGCT
14	732513	733070	24	GGCC
14	738308	739206	7373	GGCC
14	738560	739092	1859	GTAC
14	763828	764477	551	GGCC
14	764098	764964	23299	AGCT
14	764166	764456	4	GTAC
14	782624	783441	37	GGCC
14	782694	783557	1095	GTAC
15	342	938	869	GTAC
15	680	1216	16036	GGCC
15	10715	11618	22756	GTAC
15	18201	19479	26	GTAC
15	35549	36504	2	GTAC
15	72252	72902	823	GTAC
15	72475	73211	42443	GATC
15	72481	72950	92536	AGCT
15	72657	72928	748	GGCC
15	84775	85525	147641	GATC
15	84947	85993	7331	GGCC
15	85208	85474	465	GTAC
15	85268	85607	3901	AGCT
15	113811	115462	5	GGCC
15	113845	114705	19010	GATC
15	164715	164881	2	GATC
15	166628	167157	449	AGCT
15	226860	228313	7	GATC
15	277641	278269	49	GGCC
15	308992	309268	303	AGCT
15	337196	337548	11687	GTAC
15	337266	337951	36187	AGCT
15	347823	348623	595	GGCC
15	436572	436952	5542	AGCT
15	436629	437249	3546	GTAC
15	489290	489943	338	GTAC
15	489683	490409	2354	AGCT
15	497039	497494	223	GTAC
15	565373	567109	93	GGCC
15	566246	567263	376	GTAC
15	600523	600941	815	AGCT
15	600778	600964	763	GTAC
15	656454	657089	2084	GGCC
15	656506	656864	9764	GTAC
15	656612	656778	13407	AGCT
15	680670	681550	3925	GGCC
15	680818	682295	692	AGCT
15	696193	696253	65	AGCT
15	713811	714404	80	AGCT
15	766333	766843	191	AGCT
15	766482	767109	14640	GGCC
15	766672	767592	63	GTAC
15	782274	783818	525	GATC
15	782800	783840	172	GGCC
15	854042	855070	528	GTAC
15	854395	855430	16	AGCT
15	854665	855686	551	GGCC
15	872878	874568	20	GTAC
15	873866	874886	1968	AGCT
15	873939	874561	1193	GATC
15	908011	909861	120	GGCC
15	908160	908454	2208	AGCT
15	980754	982817	116	GGCC
15	1007807	1008085	178	AGCT
15	1047399	1047634	23	GGCC
15	1052425	1054030	77	GGCC
15	1083439	1085336	84	AGCT
16	5798	7700	23	AGCT
16	42653	43429	1207	GGCC
16	42736	43271	1958	GTAC
16	73012	73658	4714	GTAC
16	116048	117292	2043	GGCC
16	116095	117297	4822	GTAC
16	116500	116741	327	GATC
16	162258	163160	27	GTAC
16	209986	210882	29	GGCC
16	261270	261750	19616	GGCC
16	261462	261985	2636	AGCT
16	261470	261891	3408	GTAC
16	287887	289867	58	GGCC
16	289463	290366	55	GTAC
16	309145	309479	574	AGCT
16	317113	317611	7	AGCT
16	384356	384733	180	GGCC
16	384480	384914	2475	GTAC
16	384536	385151	4893	AGCT
16	418093	418930	1085	GATC
16	418115	418483	8656	GTAC
16	427652	427986	49	GTAC
16	453415	453520	76	GGCC
16	456573	457267	139	GTAC
16	511605	512261	38	GATC
16	511631	511789	27	GTAC
16	562996	564258	319	AGCT
16	563239	564382	7580	GGCC
16	563585	565162	473	GTAC
16	563687	564055	145	GATC
16	592318	592512	65	GTAC
16	598851	599101	2498	GATC
16	633345	634569	67	GTAC
16	633663	634173	17575	GGCC
16	684395	684715	83	GTAC
16	694758	695500	722	GGCC
16	695071	696041	42142	GTAC
16	748586	749426	87	GGCC
16	748672	750214	12	GTAC
16	748714	749455	15	GATC
16	748895	749238	10	AGCT
16	776042	777924	14	GGCC
16	776585	777252	3648	GTAC
16	819000	819438	2186	GATC
16	819044	819390	10588	AGCT
16	819153	819532	51	GGCC
16	842380	843175	710	AGCT
16	880492	881408	1227	GGCC
16	880834	881091	855	AGCT
16	941044	942666	172	GGCC
16	941822	942645	746	GTAC
16	942187	943235	14	AGCT
