# Supplementary material for: High-resolution mapping, characterization, and optimization of autonomously replicating sequences in yeast
Source: HighWire-hosted journal article supplement (doi:10.1101/gr.144659.112), 2012-12-12
Supplement: Supp_Table2.xlsx [file Supp_Table2.xlsx]

## Sheet: all_12338_fltrd_mini_fragments_
Supplementary Table 2 - List of miniARS-seq fragments, post-filtering
chr	start	end	read_depth
1	630	773	12
1	633	770	2
1	635	783	26
1	635	784	4757
1	649	777	2
1	652	776	37
1	652	777	7169
1	660	778	5
1	660	779	838
1	660	791	10
1	669	785	3
1	669	786	441
1	671	773	6
1	671	810	3230
1	672	810	10
1	673	840	66
1	684	801	3954
1	685	801	7
1	686	813	2
1	687	808	11
1	687	813	1507
1	688	813	26
1	689	778	114
1	689	809	317
1	689	837	4
1	689	838	549
1	690	809	5
1	691	1244	1416
1	693	787	147
1	693	805	7
1	693	806	444
1	693	811	3
1	693	812	259
1	693	821	7
1	693	822	2325
1	693	824	14
1	693	825	622
1	693	848	46
1	693	849	7933
1	694	798	570
1	695	798	5
1	697	896	12
1	700	809	14
1	700	810	4310
1	700	842	69
1	700	843	14319
1	700	844	2
1	701	810	25
1	705	810	185
1	706	805	17
1	706	806	1455
1	706	810	5
1	707	825	165
1	41991	42151	17
1	41991	42152	2259
1	70301	70471	5
1	70301	70472	123
1	124375	124566	949
1	124376	124566	6
1	124389	124571	1912
1	124390	124571	12
1	124393	124542	5513
1	124394	124542	5
1	124410	124575	2218
1	124410	124590	105
1	124411	124575	23
1	124411	124590	4
1	124426	124590	149
1	124476	124575	118
1	124494	124576	162
1	124494	124613	218
2	14	243	2488
2	15	243	23
2	39	202	53
2	6423	6652	1043
2	6427	6646	12
2	6427	6663	235
2	6495	6620	2
2	6496	6620	1014
2	6497	6620	6
2	6597	6854	9
2	63198	63385	233
2	63213	63393	424
2	63214	63393	2
2	63235	63375	3
2	63235	63376	1623
2	63235	63377	4
2	63236	63376	12
2	63243	63379	573
2	63244	63379	6
2	63250	63388	91
2	63252	63384	55
2	93364	93517	73
2	93370	93553	110
2	93371	93553	2
2	93409	93535	5
2	93414	93534	21
2	93415	93534	2
2	93432	93529	31
2	143500	143717	14
2	143500	143718	1814
2	143500	143719	2
2	143538	143714	375
2	143539	143714	3
2	143541	143707	37
2	143541	143708	8224
2	143545	143723	2767
2	143546	143723	33
2	143549	143730	80
2	143550	143730	3
2	143556	143713	148
2	143581	143717	18
2	143581	143718	1758
2	143581	143721	280
2	143585	143731	335
2	143586	143731	4
2	143592	143710	205
2	143592	143719	2
2	143592	143720	6
2	143592	143721	275
2	143592	143728	15
2	143592	143729	2103
2	143592	143730	2
2	143594	143706	132
2	143607	143717	185
2	143616	143725	8
2	143616	143726	865
2	143616	143729	302
2	143619	143712	16
2	143619	143713	528
2	143619	143714	3
2	170113	170241	2480
2	170114	170241	13
2	170130	170267	241
2	170131	170267	2
2	170134	170274	134
2	198259	198462	12
2	198259	198463	357
2	198274	198435	139
2	237650	237861	5
2	237650	237862	633
2	237712	237861	20
2	237746	237962	598
2	237747	237962	5
2	254888	255040	10
2	254888	255041	1881
2	254921	255068	2186
2	254922	255068	19
2	254932	255040	9
2	254932	255041	1193
2	254942	255110	4
2	254943	255110	35048
2	254944	255110	124
2	254954	255099	16
2	254954	255100	7845
2	407832	408040	9
2	407832	408041	629
2	407833	408039	12
2	407833	408040	1996
2	407834	408023	22
2	407834	408024	2860
2	407847	408050	10
2	407847	408051	1706
2	407863	408025	134
2	407864	408028	16
2	407870	408077	989
2	407871	408077	4
2	407877	408065	2209
2	407878	408065	16
2	407890	408061	29
2	407890	408073	40
2	407890	408074	5175
2	407897	408050	2
2	407897	408051	413
2	407900	408060	263
2	407901	408060	3
2	407904	408092	134
2	407905	408092	2
2	407907	408051	404
2	407908	408051	2
2	407912	408127	5
2	407912	408128	303
2	486591	486701	11
2	486627	486710	5
2	486627	486711	388
2	486718	486884	121
2	486824	486982	43
2	517139	517341	351
2	741586	741757	30
2	741586	741758	2805
2	741606	741777	2
2	741606	741778	105
2	741610	741752	217
2	741616	741760	152
2	741621	741800	5
2	741621	741801	390
2	741624	741763	91
2	741635	741753	2
2	741635	741754	223
2	791774	791990	3
2	792170	792262	125
3	930	1110	3
3	930	1127	328
3	930	1136	2
3	930	1142	6
3	930	1169	2
3	931	1127	6
3	932	1061	664
3	933	1144	428
3	942	1110	14705
3	943	1110	115
3	944	1075	4
3	945	1068	35
3	950	1089	2
3	954	1142	5
3	957	1066	24
3	957	1087	2
3	957	1088	181
3	957	1102	82
3	957	1169	3
3	958	1078	4
3	965	1129	95
3	966	1110	19
3	966	1136	690
3	967	1129	2
3	967	1136	4
3	968	1067	58
3	968	1108	5
3	968	1136	21
3	975	1128	2
3	976	1128	12898
3	976	1163	2
3	977	1128	52
3	977	1136	648
3	978	1136	5
3	984	1117	4
3	984	1118	767
3	984	1131	2
3	986	1104	94
3	986	1129	7
3	986	1146	357
3	986	1149	5
3	987	1104	2
3	987	1123	6
3	987	1124	801
3	987	1146	5
3	988	1145	12
3	1004	1161	20
3	1004	1162	2028
3	1022	1145	38
3	11177	11341	9
3	11177	11345	11
3	11177	11346	2
3	11183	11304	198
3	11192	11345	25
3	11198	11345	4
3	11199	11333	32
3	11199	11344	16798
3	11199	11345	89464
3	11200	11344	77
3	11200	11345	278
3	11202	11305	737
3	11202	11323	100
3	11202	11345	7128
3	11202	11350	21
3	11203	11305	2
3	11203	11341	8
3	11203	11345	4
3	11203	11347	29002
3	11204	11345	24859
3	11204	11347	41
3	11205	11345	2
3	11210	11341	2
3	11210	11345	6
3	11210	11347	2
3	11213	11333	82
3	11213	11341	5
3	11213	11345	16
3	11213	11347	4
3	11215	11333	1597
3	11216	11333	5
3	11217	11332	303
3	11218	11332	3
3	11219	11332	145
3	11219	11333	1705
3	11219	11345	1243
3	11220	11333	5
3	11220	11345	2
3	11221	11333	4
3	11221	11342	5
3	11221	11345	84959
3	11222	11332	3
3	11225	11329	433
3	11225	11332	21
3	11225	11333	2195
3	11225	11334	2
3	11225	11341	48
3	11225	11344	2
3	11225	11345	40287
3	11225	11347	7
3	11226	11329	2
3	11226	11345	2
3	11228	11345	17681
3	11229	11334	247
3	11229	11345	18
3	11231	11339	868
3	11232	11339	3
3	11234	11329	31
3	11236	11345	6
3	11237	11318	200
3	11237	11329	74
3	11237	11331	109
3	11237	11333	444
3	11237	11335	22
3	11237	11336	2770
3	11237	11341	14
3	11237	11345	47950
3	11238	11318	3
3	11238	11333	6
3	11238	11345	89
3	11245	11336	48
3	11249	11341	2
3	11249	11361	7441
3	11250	11361	6
3	39504	39595	71
3	39507	39647	5
3	39507	39648	209
3	131941	132114	222
3	132003	132152	20
3	132036	132171	135
3	166537	166716	489
3	166538	166716	5
3	166594	166716	112
3	166610	166708	2
3	166630	166718	139
3	166630	166775	1341
3	194214	194355	96
3	194214	194363	326
3	194214	194364	33
3	194214	194365	2166
3	194214	194393	9
3	194219	194379	5
3	194219	194380	924
3	194219	194383	468
3	194220	194380	814
3	194220	194383	7
3	194221	194380	9
3	194221	194421	7
3	194221	194422	779
3	194222	194359	706
3	194223	194359	6
3	194224	194354	73
3	194224	194377	195
3	194224	194408	607
3	194225	194376	2
3	194225	194377	168
3	194225	194408	8
3	194229	194373	798
3	194230	194373	7
3	194231	194408	213
3	194233	194389	1732
3	194234	194389	29
3	194235	194364	9
3	194235	194365	347
3	194240	194364	9
3	194240	194365	315
3	194240	194383	108
3	194245	194355	516
3	194245	194380	433
3	194246	194355	6
3	194246	194375	177
3	194246	194380	2445
3	194246	194412	92
3	194246	194413	1082
3	194247	194373	2
3	194247	194380	8
3	194248	194373	1731
3	194248	194376	137
3	194248	194411	438
3	194249	194355	1489
3	194249	194362	243
3	194249	194373	260
3	194249	194376	226
3	194249	194380	211
3	194249	194392	4
3	194249	194393	2372
3	194250	194355	12
3	194250	194373	4
3	194250	194376	2
3	194250	194380	4
3	194253	194373	489
3	194253	194377	78
3	194254	194373	10
3	194256	194376	356
3	194256	194385	462
3	194256	194389	174
3	194257	194376	8
3	194257	194389	3
3	194259	194376	246
3	194260	194376	4
3	194263	194373	61
3	194263	194385	127
3	194263	194408	816
3	194263	194412	5
3	194263	194413	2526
3	194264	194366	7
3	194264	194367	557
3	194264	194385	2
3	194264	194387	17
3	194264	194388	1263
3	194264	194408	7
3	194265	194373	314
3	194265	194376	302
3	194266	194355	254
3	194266	194373	5
3	194266	194376	132
3	194267	194355	3
3	194267	194373	541
3	194268	194359	894
3	194268	194373	127
3	194268	194394	3
3	194268	194395	112
3	194268	194421	36
3	194268	194422	16051
3	194269	194354	466
3	194269	194359	8
3	194269	194372	4
3	194269	194373	426
3	194269	194404	1104
3	194270	194354	3
3	194270	194404	15
3	194272	194399	11
3	194272	194400	6357
3	194272	194422	67
3	194273	194354	167
3	194273	194422	405
3	194274	194372	3
3	194274	194373	156
3	194274	194375	6
3	194274	194376	428
3	194274	194395	915
3	194274	194405	141
3	194274	194422	383
3	194275	194377	147
3	194275	194395	6
3	194275	194405	3
3	194275	194422	3
3	194276	194355	101
3	194276	194372	4
3	194276	194373	513
3	194276	194444	1277
3	194277	194400	347
3	194278	194355	14
3	194278	194365	34
3	194278	194373	92
3	194278	194375	48
3	194278	194376	2512
3	194278	194382	1639
3	194278	194389	703
3	194278	194400	4
3	194278	194410	2110
3	194278	194414	24
3	194278	194415	7604
3	194279	194373	4
3	194279	194382	16
3	194279	194389	18
3	194279	194410	25
3	194279	194415	2
3	194279	194422	3066
3	194280	194422	51
3	194281	194377	4
3	194281	194378	282
3	194282	194393	2
3	194282	194397	25
3	194282	194398	7585
3	194282	194399	4
3	194282	194457	12
3	194282	194458	6509
3	194284	194372	8
3	194284	194373	473
3	194284	194396	4
3	194284	194397	115
3	194284	194421	13
3	194284	194422	2156
3	194286	194400	179
3	194287	194379	2
3	194287	194380	99
3	194287	194400	4
3	194288	194375	5
3	194288	194376	327
3	194289	194375	235
3	194290	194375	3
3	194290	194414	1740
3	194290	194449	3
3	194290	194450	202
3	194291	194414	5
3	194295	194369	239
3	194295	194389	203
3	194295	194434	10
3	194295	194435	2406
3	194296	194369	7
3	194296	194377	48
3	194296	194389	2
3	194296	194414	8
3	194296	194415	790
3	194296	194421	11
3	194296	194422	1427
3	194296	194432	1402
3	194299	194370	32
3	194299	194376	38
3	194299	194388	197
3	194299	194391	18
3	194299	194392	1733
3	194299	194393	1825
3	194299	194395	231
3	194299	194399	7
3	194299	194400	1274
3	194299	194401	20
3	194299	194402	1699
3	194299	194403	2
3	194299	194406	12561
3	194299	194408	33
3	194299	194409	8669
3	194299	194410	8361
3	194299	194411	3949
3	194299	194412	2
3	194299	194421	30
3	194299	194422	9910
3	194300	194388	3
3	194300	194395	6
3	194300	194406	24
3	194300	194422	6
3	194301	194422	3
3	194302	194422	3932
3	194302	194472	582
3	194303	194422	8
3	194303	194472	4
3	197451	197590	12
3	197451	197591	767
3	224790	224926	135
3	224823	224991	2008
3	224824	224944	50
3	224824	224991	16
3	224834	224985	8
3	224834	224986	592
3	224837	224980	50
3	224838	224980	2
3	224843	224994	11
3	224843	224995	3321
3	292525	292682	711
3	292564	292690	46
3	292566	292690	945
3	292568	292690	143
3	292569	292682	2
3	292570	292690	8
3	292571	292682	9
3	292571	292744	125
3	292573	292682	1569
3	292573	292705	3
3	292573	292714	2
3	292573	292717	16
3	292573	292720	13
3	292573	292721	17
3	292573	292723	60
3	292573	292730	4
3	292573	292732	3
3	292573	292735	86
3	292573	292736	31
3	292573	292738	63
3	292573	292740	30
3	292573	292743	48
3	292573	292744	33691
3	292573	292745	38
3	292573	292755	27
3	292573	292756	33
3	292573	292765	2
3	292573	292776	8
3	292573	292780	18
3	292574	292682	7
3	292575	292682	9361
3	292575	292693	2970
3	292575	292704	2
3	292575	292717	3
3	292575	292720	6
3	292575	292721	4
3	292575	292723	10
3	292575	292730	3
3	292575	292732	2
3	292575	292735	19
3	292575	292736	5
3	292575	292738	11
3	292575	292740	9
3	292575	292744	771
3	292575	292745	16
3	292575	292752	3
3	292575	292755	8
3	292575	292756	8
3	292575	292758	2
3	292575	292771	3
3	292575	292776	3
3	292576	292682	20
3	292576	292693	7
3	292577	292682	5231
3	292577	292687	5
3	292577	292693	11
3	292577	292714	3
3	292577	292717	2
3	292577	292720	3
3	292577	292721	7
3	292577	292723	11
3	292577	292735	16
3	292577	292736	7
3	292577	292738	8
3	292577	292740	6
3	292577	292744	16
3	292577	292745	6
3	292577	292755	5
3	292577	292756	10
3	292578	292682	15
3	292578	292687	2
3	292579	292682	5
3	292579	292686	22
3	292579	292687	33077
3	292579	292688	2
3	292579	292704	11
3	292579	292709	4589
3	292579	292710	3
3	292579	292723	7
3	292579	292732	2
3	292579	292735	2
3	292579	292736	7
3	292579	292738	6
3	292579	292740	9
3	292579	292744	8
3	292579	292745	6
3	292579	292752	6
3	292579	292771	8
3	292579	292776	3
3	292580	292687	58
3	292580	292709	3
3	292581	292682	315
3	292581	292704	5
3	292581	292710	2
3	292581	292732	5
3	292581	292736	5
3	292581	292740	7
3	292581	292744	6
3	292581	292745	6
3	292581	292752	2
3	292581	292771	5
3	292582	292682	4
3	292582	292687	4
3	292582	292704	3
3	292582	292705	4691
3	292582	292708	3
3	292582	292709	4
3	292582	292711	10
3	292582	292714	19
3	292582	292717	60
3	292582	292720	53
3	292582	292721	113
3	292582	292722	90
3	292582	292723	245314
3	292582	292730	21
3	292582	292732	13
3	292582	292735	230
3	292582	292736	94
3	292582	292738	147
3	292582	292740	85
3	292582	292742	2
3	292582	292744	119
3	292582	292745	80
3	292582	292748	3
3	292582	292755	104
3	292582	292756	113
3	292582	292758	10
3	292582	292765	9
3	292582	292776	23
3	292582	292780	40
3	292583	292682	30
3	292583	292687	11078
3	292583	292689	2
3	292583	292693	4
3	292583	292694	294
3	292583	292695	3349
3	292583	292704	148
3	292583	292705	6
3	292583	292706	2484
3	292583	292709	15
3	292583	292710	97
3	292583	292711	6
3	292583	292712	56
3	292583	292713	10
3	292583	292714	8
3	292583	292716	31
3	292583	292717	92776
3	292583	292718	4
3	292583	292720	52
3	292583	292721	37
3	292583	292723	129
3	292583	292730	6
3	292583	292732	100
3	292583	292735	73
3	292583	292736	103350
3	292583	292738	56
3	292583	292740	318
3	292583	292744	296
3	292583	292745	81348
3	292583	292752	278
3	292583	292755	85
3	292583	292756	39
3	292583	292758	4
3	292583	292759	4
3	292583	292765	2
3	292583	292771	435
3	292583	292776	158
3	292583	292780	11
3	292584	292682	2
3	292584	292687	33
3	292584	292704	35
3	292584	292705	11237
3	292584	292706	3
3	292584	292710	3
3	292584	292712	2
3	292584	292714	2
3	292584	292717	2
3	292584	292720	5
3	292584	292721	2
3	292584	292723	4
3	292584	292732	4
3	292584	292735	4
3	292584	292736	85
3	292584	292738	5
3	292584	292740	17
3	292584	292744	14
3	292584	292745	57
3	292584	292752	8
3	292584	292755	2
3	292584	292756	2
3	292584	292771	13
3	292584	292776	5
3	292585	292679	297
3	292585	292681	37
3	292585	292682	29432
3	292585	292687	8
3	292585	292690	3
3	292585	292693	2
3	292585	292704	114
3	292585	292705	12
3	292585	292708	8
3	292585	292709	23
3	292585	292710	63
3	292585	292711	25
3	292585	292712	38
3	292585	292713	10
3	292585	292714	51
3	292585	292717	133
3	292585	292720	297
3	292585	292721	211742
3	292585	292723	641
3	292585	292730	76
3	292585	292732	111
3	292585	292735	1014
3	292585	292736	217666
3	292585	292738	450
3	292585	292739	4
3	292585	292740	95691
3	292585	292742	16
3	292585	292744	96388
3	292585	292745	467
3	292585	292746	6
3	292585	292748	2
3	292585	292752	244
3	292585	292754	104
3	292585	292755	144863
3	292585	292756	431
3	292585	292758	33
3	292585	292759	4
3	292585	292762	4
3	292585	292763	2269
3	292585	292765	20
3	292585	292771	392
3	292585	292775	3
3	292585	292776	57233
3	292585	292780	209
3	292586	292682	15
3	292586	292697	1723
3	292586	292704	5
3	292586	292710	4
3	292586	292712	2
3	292586	292720	2
3	292586	292721	3
3	292586	292723	2
3	292586	292732	2
3	292586	292736	11
3	292586	292740	15736
3	292586	292744	51
3	292586	292745	7
3	292586	292752	12
3	292586	292755	10
3	292586	292771	14
3	292586	292776	43
3	292587	292740	7
3	292588	292712	39
3	292589	292682	9
3	292589	292687	3
3	292589	292688	661
3	292589	292692	32
3	292589	292693	5414
3	292589	292704	27
3	292589	292705	2
3	292589	292708	4
3	292589	292709	6
3	292589	292710	13
3	292589	292711	7
3	292589	292712	8
3	292589	292714	13
3	292589	292717	45
3	292589	292720	87
3	292589	292721	102
3	292589	292723	262
3	292589	292730	21
3	292589	292731	2
3	292589	292732	58719
3	292589	292735	7691
3	292589	292736	170
3	292589	292738	157
3	292589	292740	28715
3	292589	292742	6
3	292589	292744	341
3	292589	292745	140663
3	292589	292746	7
3	292589	292748	2
3	292589	292752	48
3	292589	292755	176
3	292589	292756	175
3	292589	292758	7
3	292589	292763	3
3	292589	292765	10
3	292589	292771	52
3	292589	292776	61
3	292589	292780	100
3	292590	292688	5
3	292590	292693	19
3	292590	292732	29
3	292590	292740	22
3	292590	292745	2
3	292592	292682	6
3	292592	292704	7
3	292592	292710	6
3	292592	292712	32785
3	292592	292723	2
3	292592	292732	2
3	292592	292740	12
3	292592	292744	4
3	292592	292745	5
3	292592	292752	3
3	292592	292755	2
3	292592	292771	13
3	292592	292776	5
3	292593	292682	7
3	292593	292687	304
3	292593	292692	2
3	292593	292693	221
3	292593	292694	80
3	292593	292700	178
3	292593	292704	45
3	292593	292705	4
3	292593	292707	15
3	292593	292708	15082
3	292593	292709	18018
3	292593	292710	67
3	292593	292711	54665
3	292593	292712	51
3	292593	292713	2
3	292593	292714	4304
3	292593	292717	39
3	292593	292720	76
3	292593	292721	97
3	292593	292722	56
3	292593	292723	84553
3	292593	292729	32
3	292593	292730	38686
3	292593	292732	17
3	292593	292734	44
3	292593	292735	33111
3	292593	292736	142
3	292593	292738	94
3	292593	292740	25724
3	292593	292742	3
3	292593	292744	173
3	292593	292745	123
3	292593	292752	61
3	292593	292755	29585
3	292593	292756	114
3	292593	292758	10
3	292593	292764	14
3	292593	292765	9424
3	292593	292771	76
3	292593	292776	51
3	292593	292780	66
3	292594	292704	3
3	292594	292705	1003
3	292594	292711	3
3	292594	292714	12
3	292594	292723	2
3	292594	292735	5
3	292594	292738	2
3	292594	292740	21
3	292594	292755	13
3	292597	292717	1208
3	292597	292739	12
3	292597	292740	1700
3	292597	292753	197
3	292597	292777	73
3	292598	292721	280
3	292598	292723	249
3	292598	292740	2
3	292598	292753	2
3	292601	292740	2
3	292601	292744	2
3	292602	292717	2
3	292602	292721	3
3	292602	292723	4
3	292602	292735	11
3	292602	292738	2
3	292602	292740	5
3	292602	292744	4
3	292602	292745	4
3	292602	292755	4
3	292602	292756	2
3	292602	292780	4
3	292604	292720	130
3	292604	292744	268
3	292605	292744	4
3	292606	292739	4
3	292606	292740	298
3	292606	292756	235
3	292607	292704	2
3	292607	292713	2
3	292607	292720	228
3	292607	292736	3
3	292607	292740	4
3	292607	292744	128
3	292607	292745	6
3	292607	292755	13
3	292607	292756	2908
3	292607	292771	5
3	292607	292776	3
3	292608	292740	376
3	292609	292720	639
3	292609	292740	2
3	292610	292720	4
3	292610	292743	16
3	292610	292744	1756
3	292610	292745	2
3	292610	292747	6
3	292610	292748	1938
3	292610	292756	85
3	292611	292700	1171
3	292611	292756	2
3	292612	292700	10
3	292613	292686	2
3	292613	292687	111
3	292616	292721	2
3	292616	292735	2
3	292616	292738	2
3	292616	292776	2
3	292616	292780	2
3	292618	292732	7
3	292626	292735	2
3	292626	292736	95
3	292627	292735	2
3	292629	292723	700
3	292629	292730	40
3	292629	292755	11
3	292629	292756	890
3	292629	292762	176
3	292629	292786	417
3	292630	292723	2
3	292630	292730	2
3	292630	292734	5
3	292630	292735	287
3	292630	292736	3
3	292630	292738	14
3	292630	292739	1306
3	292630	292743	18
3	292630	292744	3644
3	292630	292745	2
3	292630	292753	81
3	292630	292780	2
3	292631	292721	442
3	292631	292753	2
3	292631	292755	2
3	292631	292756	157
3	292632	292753	64
3	292633	292739	4
3	292633	292740	515
3	292635	292739	4
3	292635	292740	1072
3	292635	292750	2
3	292635	292751	221
3	292637	292744	171
3	292641	292786	819
3	292645	292786	752
3	292648	292735	4
3	292648	292740	2
3	292648	292780	2
3	292649	292746	468
3	292650	292714	2
3	292650	292720	2
3	292650	292723	4
3	292650	292729	2
3	292650	292730	239
3	292650	292735	26
3	292650	292736	3
3	292650	292738	4
3	292650	292740	7
3	292650	292742	4
3	292650	292744	331
3	292650	292745	14
3	292650	292755	4
3	292650	292756	21
3	292650	292758	4
3	292650	292765	2
3	292650	292776	15
3	292650	292780	25
3	292657	292714	3
3	292657	292786	2176
3	292663	292786	588
3	292664	292785	1952
3	294711	294894	2
3	294711	294898	1768
3	294711	294909	68
3	294711	294910	1429
3	294711	294916	861
3	294713	294897	4
3	294713	294898	519
3	294715	294866	166
3	294715	294906	2
3	294715	294909	11
3	294715	294910	1115
3	294724	294893	11
3	294724	294894	1471
3	294732	294903	2
3	294733	294894	3
3	294733	294896	5
3	294733	294897	347
3	294733	294903	8368
3	294733	294905	17
3	294733	294906	4252
3	294733	294908	3
3	294733	294910	3
3	294733	294918	3
3	294733	294944	2
3	294734	294903	29
3	294735	294903	3
3	294735	294908	51
3	294735	294909	7138
3	294735	294910	4
3	294736	294897	9
3	294736	294898	1429
3	294736	294906	2
3	294736	294909	3
3	294737	294894	4
3	294737	294898	2
3	294737	294900	3
3	294737	294906	14
3	294737	294909	3
3	294737	294910	4
3	294737	294914	2
3	294737	294923	3
3	294737	294940	2
3	294739	294865	2
3	294739	294904	10
3	294739	294905	1729
3	294739	294909	4
3	294739	294910	2907
3	294739	294925	2
3	294739	294929	14
3	294739	294930	3576
3	294741	294862	2
3	294741	294894	3
3	294741	294906	3
3	294741	294909	4
3	294741	294910	4
3	294741	294918	2
3	294741	294921	3
3	294741	294922	121
3	294741	294923	25152
3	294741	294924	3
3	294741	294925	2
3	294741	294933	22
3	294741	294934	3741
3	294741	294938	4
3	294743	294894	2
3	294743	294897	3
3	294743	294898	798
3	294743	294906	4
3	294743	294910	2
3	294745	294894	4
3	294745	294906	4
3	294745	294909	4231
3	294745	294910	3
3	294745	294914	262
3	294746	294909	25
3	294746	294914	2
3	294747	294888	106
3	294747	294894	8
3	294747	294898	2
3	294747	294903	3
3	294747	294905	5
3	294747	294906	10514
3	294747	294908	4
3	294747	294909	5
3	294747	294910	8740
3	294747	294923	4
3	294747	294936	2
3	294747	294944	3
3	294747	294958	2
3	294748	294906	21
3	294748	294910	27
3	294750	294894	8
3	294750	294898	2
3	294750	294905	2
3	294750	294906	35707
3	294750	294908	5
3	294750	294909	5
3	294750	294910	12
3	294750	294914	3
3	294750	294918	2
3	294750	294923	3
3	294750	294935	5
3	294750	294939	4
3	294750	294944	4
3	294750	294952	2
3	294750	294953	2
3	294750	294955	2
3	294750	294958	3
3	294750	294970	2
3	294751	294894	5
3	294751	294898	6
3	294751	294900	4
3	294751	294905	4
3	294751	294906	80
3	294751	294908	6
3	294751	294910	11
3	294751	294916	9800
3	294751	294918	4
3	294751	294923	8
3	294751	294925	3
3	294751	294935	14314
3	294751	294936	3
3	294751	294944	3
3	294751	294950	2
3	294751	294953	3
3	294751	294958	1426
3	294751	294970	3
3	294752	294897	4
3	294752	294898	1367
3	294752	294910	2
3	294752	294916	20
3	294752	294935	50
3	294753	294891	868
3	294753	294894	2
3	294753	294906	83
3	294753	294909	4
3	294753	294910	396
3	294753	294923	3
3	294753	294935	2
3	294753	294938	2
3	294753	294957	10
3	294753	294958	4340
3	294753	294976	2
3	294754	294862	2
3	294754	294890	10
3	294754	294891	3842
3	294754	294892	2
3	294754	294893	17
3	294754	294894	1775
3	294754	294898	6
3	294754	294899	2
3	294754	294900	13816
3	294754	294903	2
3	294754	294905	9
3	294754	294906	1609
3	294754	294908	60
3	294754	294909	13913
3	294754	294910	12
3	294754	294914	3
3	294754	294916	3
3	294754	294918	4
3	294754	294923	27515
3	294754	294925	3
3	294754	294935	3
3	294754	294944	7
3	294754	294970	2
3	294754	294980	3
3	294755	294900	47
3	294755	294903	2
3	294755	294906	3
3	294755	294923	71
3	294756	294892	675
3	294757	294889	94
3	294757	294892	3
3	294757	294893	2
3	294757	294894	34622
3	294757	294900	3
3	294757	294903	2
3	294757	294905	4
3	294757	294906	12
3	294757	294909	6
3	294757	294910	1619
3	294757	294918	4
3	294757	294922	2
3	294757	294923	11
3	294757	294925	2
3	294757	294935	3
3	294757	294936	2
3	294757	294937	127
3	294757	294938	26840
3	294757	294939	4
3	294757	294944	3
3	294757	294955	2
3	294757	294958	7
3	294757	294970	2
3	294758	294894	133
3	294758	294910	2
3	294759	294902	47
3	294759	294903	7194
3	294759	294910	7
3	294759	294922	2
3	294759	294938	2
3	294760	294894	10
3	294760	294898	3
3	294760	294903	3
3	294760	294905	4
3	294760	294906	18
3	294760	294908	8
3	294760	294909	2
3	294760	294910	23261
3	294760	294914	4
3	294760	294918	3
3	294760	294923	3
3	294760	294925	2
3	294760	294935	3
3	294760	294943	2
3	294760	294944	6
3	294760	294955	2
3	294760	294958	2
3	294760	294970	3
3	294761	294906	4
3	294761	294908	4
3	294761	294910	98
3	294761	294936	8864
3	294761	294939	2
3	294762	294936	10
3	294763	294891	19
3	294763	294892	4487
3	294763	294893	4
3	294763	294894	908
3	294763	294898	3
3	294763	294900	3
3	294763	294903	3
3	294763	294904	4
3	294763	294905	20826
3	294763	294906	19
3	294763	294908	10
3	294763	294909	6
3	294763	294910	21
3	294763	294913	2
3	294763	294914	3
3	294763	294916	2
3	294763	294918	4
3	294763	294923	8
3	294763	294930	4014
3	294763	294935	4
3	294763	294936	4
3	294763	294939	4803
3	294763	294944	8
3	294763	294950	5
3	294763	294953	9173
3	294763	294955	2
3	294763	294958	4
3	294763	294969	23
3	294763	294970	4370
3	294764	294893	4
3	294764	294894	1629
3	294764	294905	80
3	294764	294930	9
3	294764	294939	29
3	294764	294953	52
3	294765	294905	3
3	294765	294906	9
3	294765	294910	3
3	294765	294923	5
3	294765	294935	2
3	294765	294940	2
3	294765	294944	4
3	294766	294892	3
3	294766	294894	11
3	294766	294895	2
3	294766	294898	4
3	294766	294900	6
3	294766	294903	3
3	294766	294905	2
3	294766	294906	28
3	294766	294908	14
3	294766	294909	3
3	294766	294910	11
3	294766	294914	3
3	294766	294918	2
3	294766	294923	8
3	294766	294925	3
3	294766	294935	3
3	294766	294936	5
3	294766	294939	4
3	294766	294943	5
3	294766	294944	36340
3	294766	294950	3
3	294766	294953	3
3	294766	294958	7
3	294766	294970	4
3	294766	294980	3
3	294766	294992	2
3	294767	294894	22
3	294767	294898	2798
3	294767	294900	3
3	294767	294905	9
3	294767	294906	4297
3	294767	294908	10
3	294767	294909	10
3	294767	294910	192
3	294767	294914	2951
3	294767	294916	2
3	294767	294918	2
3	294767	294923	10
3	294767	294925	6
3	294767	294935	5
3	294767	294944	82
3	294767	294946	2
3	294767	294950	6
3	294767	294952	2
3	294767	294953	2
3	294767	294957	2
3	294767	294958	15540
3	294768	294898	9
3	294768	294906	8
3	294768	294914	15
3	294768	294958	57
3	294769	294906	5
3	294769	294908	2
3	294769	294909	2
3	294769	294935	3
3	294770	294891	3
3	294770	294892	3661
3	294770	294894	11
3	294770	294895	2
3	294770	294898	3
3	294770	294900	3
3	294770	294903	2
3	294770	294904	3
3	294770	294905	21
3	294770	294906	25893
3	294770	294908	10
3	294770	294909	15
3	294770	294910	3198
3	294770	294914	5173
3	294770	294918	3
3	294770	294923	8
3	294770	294926	2092
3	294770	294928	22
3	294770	294929	7116
3	294770	294930	2
3	294770	294935	2
3	294770	294939	3
3	294770	294944	5
3	294770	294950	4
3	294770	294955	2
3	294771	294892	19
3	294771	294894	3
3	294771	294898	3
3	294771	294900	2
3	294771	294906	82
3	294771	294908	5
3	294771	294909	3
3	294771	294910	18
3	294771	294914	16
3	294771	294918	5206
3	294771	294923	3
3	294771	294925	3
3	294771	294929	2
3	294771	294930	3
3	294771	294935	2
3	294771	294936	3
3	294771	294940	1833
3	294772	294894	2
3	294772	294910	1300
3	294772	294918	20
3	294772	294925	2
3	294772	294940	11
3	294773	294910	9
3	294774	294894	1299
3	294774	294898	4
3	294774	294900	281
3	294774	294905	1008
3	294774	294906	271
3	294774	294908	6
3	294774	294909	2
3	294774	294910	6037
3	294774	294914	4
3	294774	294918	2
3	294774	294923	2
3	294774	294925	5
3	294774	294932	7
3	294774	294933	584
3	294774	294935	5767
3	294774	294936	2
3	294774	294939	13
3	294774	294940	830
3	294774	294943	2
3	294774	294944	4
3	294774	294970	2
3	294775	294894	5
3	294775	294898	2
3	294775	294900	2
3	294775	294905	13
3	294775	294906	9083
3	294775	294910	24
3	294775	294935	19
3	294776	294906	54
3	294776	294910	4
3	294776	294925	1978
3	294776	294935	2
3	294777	294909	6
3	294777	294910	1098
3	294777	294925	27
3	294778	294892	603
3	294778	294894	2555
3	294778	294900	2
3	294778	294905	3369
3	294778	294906	238
3	294778	294908	4
3	294778	294909	2
3	294778	294910	6
3	294778	294923	2
3	294779	294891	2
3	294779	294892	147
3	294779	294894	19
3	294779	294905	37
3	294779	294906	2714
3	294779	294908	2
3	294779	294910	1988
3	294780	294890	10
3	294780	294891	1646
3	294780	294892	2
3	294780	294894	90
3	294780	294898	6
3	294780	294904	2
3	294780	294905	7
3	294780	294906	12814
3	294780	294908	23
3	294780	294909	4
3	294780	294910	2434
3	294780	294914	5
3	294780	294918	9
3	294780	294923	13
3	294780	294925	6
3	294780	294930	2
3	294780	294935	6
3	294780	294936	2
3	294780	294939	3
3	294780	294940	2
3	294780	294944	6
3	294780	294950	9
3	294780	294952	6440
3	294780	294953	2
3	294780	294955	3
3	294780	294958	5
3	294780	294959	1591
3	294780	294970	4
3	294780	294976	6383
3	294780	294980	4
3	294780	295223	3
3	294781	294906	96
3	294781	294909	3
3	294781	294910	14
3	294781	294952	24
3	294781	294954	52
3	294781	294955	10959
3	294781	294976	43
3	294782	294894	2
3	294783	294891	3
3	294783	294892	409
3	294783	294893	31
3	294783	294894	15317
3	294783	294896	2
3	294783	294898	406
3	294783	294900	3
3	294783	294903	4
3	294783	294904	4
3	294783	294905	142
3	294783	294906	20535
3	294783	294908	23
3	294783	294909	5379
3	294783	294910	2631
3	294783	294913	232
3	294783	294914	4010
3	294783	294916	3
3	294783	294917	3
3	294783	294918	16636
3	294783	294921	5
3	294783	294922	13
3	294783	294923	1243
3	294783	294924	6
3	294783	294925	678
3	294783	294930	2
3	294783	294935	5
3	294783	294936	2708
3	294783	294938	6
3	294783	294939	801
3	294783	294940	2
3	294783	294944	9
3	294783	294948	2
3	294783	294949	787
3	294783	294950	5
3	294783	294952	3
3	294783	294953	3
3	294783	294955	3772
3	294783	294958	5
3	294783	294970	8
3	294783	294976	3
3	294783	294979	2
3	294783	294980	7368
3	294783	294981	2003
3	294783	294992	3
3	294783	295037	2
3	294784	294894	116
3	294784	294898	7
3	294784	294906	120
3	294784	294908	2
3	294784	294909	31
3	294784	294910	15
3	294784	294912	3
3	294784	294914	18
3	294784	294918	114
3	294784	294923	3
3	294784	294936	18
3	294784	294938	2
3	294784	294955	16
3	294784	294969	3
3	294784	294970	2819
3	294784	294980	36
3	294784	294981	20
3	294785	294890	550
3	294785	294894	18
3	294785	294895	2
3	294785	294898	3
3	294785	294903	3
3	294785	294905	10
3	294785	294906	2969
3	294785	294908	32034
3	294785	294909	7
3	294785	294910	18
3	294785	294914	6
3	294785	294916	4
3	294785	294917	15
3	294785	294918	5009
3	294785	294921	2
3	294785	294923	8
3	294785	294925	5392
3	294785	294935	7
3	294785	294936	3
3	294785	294938	2
3	294785	294939	4
3	294785	294940	2
3	294785	294943	2
3	294785	294944	7
3	294785	294950	4
3	294785	294955	9
3	294785	294958	6
3	294785	294969	6
3	294785	294970	19783
3	294785	294976	2
3	294785	294977	3
3	294785	294980	2
3	294785	294981	3
3	294785	294992	3
3	294786	294890	106
3	294786	294893	13
3	294786	294894	17390
3	294786	294898	621
3	294786	294905	2
3	294786	294906	16
3	294786	294908	193
3	294786	294909	1383
3	294786	294910	3281
3	294786	294913	2310
3	294786	294917	40
3	294786	294918	6133
3	294786	294920	11
3	294786	294921	2456
3	294786	294922	5
3	294786	294923	5
3	294786	294925	58
3	294786	294936	3
3	294786	294939	3
3	294786	294948	6
3	294786	294949	564
3	294786	294953	2
3	294786	294970	80
3	294787	294894	60
3	294787	294898	11
3	294787	294906	2
3	294787	294908	3
3	294787	294909	283
3	294787	294910	11
3	294787	294913	10
3	294787	294930	147
3	294787	294935	7
3	294787	294936	1049
3	294787	294937	2
3	294787	294955	4565
3	294788	294909	3
3	294788	294955	28
3	294789	294910	299
3	294790	294894	3
3	294790	294901	4
3	294790	294902	471
3	294790	294905	197
3	294790	294920	52
3	294790	294921	9977
3	294790	294923	3
3	294790	294935	4
3	294790	294936	628
3	294791	294894	4
3	294791	294898	553
3	294791	294902	3
3	294791	294903	609
3	294791	294905	4
3	294791	294906	7
3	294791	294908	2
3	294791	294909	3
3	294791	294910	2721
3	294791	294921	86
3	294791	294922	8250
3	294791	294923	4
3	294791	294925	2
3	294791	294929	2
3	294791	294938	3
3	294791	294955	2
3	294791	294958	2
3	294791	294970	2
3	294791	294980	2368
3	294792	294898	4
3	294792	294910	6
3	294792	294980	12
3	294794	294894	2
3	294794	294906	6121
3	294794	294910	2
3	294795	294906	14
3	294796	294906	10
3	294796	294910	2
3	294796	294922	4
3	294796	294923	15016
3	294796	294925	2
3	294796	294944	3
3	294796	294950	2
3	294797	294894	7
3	294797	294898	6194
3	294797	294900	2
3	294797	294905	3
3	294797	294906	18550
3	294797	294908	6
3	294797	294910	6
3	294797	294914	2
3	294797	294918	2
3	294797	294923	34
3	294797	294925	3
3	294797	294935	4
3	294797	294950	4
3	294798	294898	67
3	294798	294905	74
3	294798	294906	111
3	294800	294894	1451
3	294800	294898	361
3	294800	294905	95
3	294800	294906	241
3	294800	294909	553
3	294800	294910	332
3	294800	294914	2
3	294800	294925	1075
3	294800	294931	146
3	294800	294935	9
3	294800	294936	1319
3	294801	294894	11
3	294801	294898	5
3	294801	294909	9
3	294801	294910	431
3	294801	294955	599
3	294802	294904	4
3	294802	294905	386
3	294802	294906	693
3	294802	294907	3
3	294802	294908	325
3	294802	294910	1105
3	294802	294922	2
3	294802	294931	204
3	294802	294934	2
3	294802	294939	2
3	294802	294943	7
3	294802	294944	642
3	294802	294955	3
3	294802	294958	2
3	294802	294963	1553
3	294803	294910	12
3	294803	294963	6
3	294803	294978	2
3	294803	294979	286
3	294804	294894	3
3	294804	294904	1794
3	294804	294906	10
3	294804	294908	77
3	294804	294910	3295
3	294804	294918	3
3	294804	294922	347
3	294804	294935	2
3	294804	294943	4893
3	294804	294944	4
3	294804	294946	1768
3	294804	294953	55
3	294805	294894	2
3	294805	294896	1759
3	294805	294898	2
3	294805	294904	11
3	294805	294905	641
3	294805	294906	2
3	294805	294910	14
3	294805	294914	2896
3	294805	294922	4
3	294805	294943	37
3	294805	294946	18
3	294806	294894	24
3	294806	294896	40
3	294806	294905	4
3	294806	294914	19
3	294807	294900	703
3	294807	294906	3
3	294807	294910	442
3	294807	294930	1481
3	294807	294931	5
3	294807	294932	360
3	294807	294935	2
3	294808	294900	10
3	294808	294910	3
3	294808	294930	18
3	294810	294910	2
3	294810	294914	2457
3	294810	294935	11
3	294810	294936	629
3	294810	294942	123
3	294810	294944	3
3	294810	294979	572
3	294811	294903	584
3	294811	294914	5
3	294811	294955	5
3	294811	294979	8
3	294812	294894	53
3	294812	294898	565
3	294812	294902	4
3	294812	294903	241
3	294812	294906	45
3	294812	294908	540
3	294812	294909	161
3	294812	294910	959
3	294812	294912	195
3	294812	294914	2824
3	294812	294918	3
3	294812	294922	2
3	294812	294923	5
3	294812	294926	137
3	294812	294930	1404
3	294812	294932	4
3	294812	294933	471
3	294812	294935	2
3	294812	294936	1985
3	294812	294938	3042
3	294812	294939	3492
3	294812	294950	3
3	294812	294953	2
3	294812	294954	11
3	294812	294955	12105
3	294812	294957	315
3	294812	294958	6
3	294812	294970	5
3	294812	294972	3
3	294812	294973	484
3	294812	294976	2
3	294812	294977	6708
3	294812	294980	5
3	294812	294988	4
3	294812	294989	107
3	294812	294990	284
3	294812	294992	2
3	294812	295005	478
3	294812	295019	2038
3	294812	295021	5
3	294812	295022	493
3	294813	294898	5
3	294813	294908	6
3	294813	294912	3
3	294813	294914	39
3	294813	294930	9
3	294813	294936	13
3	294813	294938	3
3	294813	294939	24
3	294813	294955	24
3	294813	294977	30
3	294813	295005	3
3	294813	295019	12
3	294814	294910	1198
3	294815	294910	5
3	294815	294983	118
3	295261	295405	2
3	315713	315888	2
3	315713	315913	7283
3	315713	315920	2
3	315714	315913	37
3	315720	315957	649
3	315730	315897	20
3	315731	315961	471
3	315737	315864	318
3	315745	315897	4
3	315765	315872	839
3	315765	315877	6035
3	315765	315888	2
3	315765	315902	2
3	315765	315904	2331
3	315765	315907	2945
3	315766	315872	7
3	315766	315877	27
3	315766	315904	19
3	315766	315907	24
3	315768	315866	3
3	315768	315870	856
3	315768	315871	5
3	315768	315872	3186
3	315768	315877	1081
3	315768	315884	879
3	315768	315886	13980
3	315768	315887	7
3	315768	315888	387
3	315768	315890	2589
3	315768	315893	4
3	315768	315895	3
3	315768	315896	110
3	315768	315897	4522
3	315768	315901	20
3	315768	315902	2413
3	315768	315904	557
3	315768	315905	11697
3	315768	315906	2843
3	315768	315907	2
3	315768	315913	3104
3	315768	315917	3
3	315768	315920	3
3	315768	315922	3
3	315768	315925	1197
3	315768	315928	16862
3	315768	315963	22
3	315768	315964	3
3	315768	315968	1546
3	315770	315928	12
3	315770	315961	2
3	315770	315964	3
3	315771	315872	492
3	315771	315877	870
3	315771	315884	4082
3	315771	315888	3
3	315771	315890	5
3	315771	315896	370
3	315771	315897	3686
3	315771	315903	2138
3	315771	315904	4859
3	315771	315908	478
3	315771	315920	2
3	315771	315924	5466
3	315771	315928	5
3	315771	315933	2462
3	315771	315961	2960
3	315771	315964	14940
3	315772	315872	7
3	315772	315884	15
3	315772	315896	4
3	315772	315897	15
3	315772	315903	8
3	315772	315904	24
3	315772	315908	3
3	315772	315924	27
3	315772	315933	13
3	315772	315961	19
3	315772	315964	86
3	315773	315876	150
3	315774	315893	1731
3	315774	315907	2853
3	315774	315919	68
3	315774	315920	12199
3	315775	315893	14
3	315775	315907	16
3	315777	315921	48
3	315777	315922	4291
3	315779	315892	3
3	315779	315893	252
3	315780	315904	586
3	315781	315904	6
3	315782	315902	999
3	315782	315904	2
3	315782	315917	2
3	315782	315992	12
3	315783	315902	6
3	315785	315943	5
3	315785	315961	3
3	315785	315998	2
3	315786	315934	19
3	315786	315935	1712
3	315786	315956	24
3	315786	315957	3935
3	315788	315902	209
3	315788	315904	37
3	315788	315951	24
3	315788	315952	3544
3	315788	315957	3
3	315788	315964	2276
3	315788	315978	3266
3	315788	315998	3369
3	315789	315902	2
3	315789	315964	12
3	315789	315978	24
3	315790	315902	131
3	315790	315906	19
3	315790	315919	3
3	315790	315920	481
3	315790	315952	2
3	315790	315957	4879
3	315790	315965	405
3	315791	315957	27
3	315791	315965	2
3	315792	315957	339
3	315792	315998	1173
3	315793	315917	106
3	315793	315955	14
3	315793	315956	874
3	315793	315957	2
3	315793	315998	8
3	315794	315904	85
3	315794	315909	643
3	315795	315909	7
3	315799	315904	280
3	315799	315919	2
3	315799	315920	27
3	315804	315950	8
3	315804	315961	2
3	315807	315897	487
3	315807	315911	23
3	315807	315912	2049
3	315808	315897	7
3	315808	315905	42
3	315808	315906	255
4	45986	46255	19
4	45986	46256	3105
4	46045	46243	156
4	46045	46244	27690
4	46045	46245	3
4	46045	46256	3
4	46045	46268	2
4	46053	46246	632
4	46053	46255	18
4	46053	46256	2875
4	46054	46246	8
4	46054	46256	2
4	46058	46252	22
4	46058	46253	2109
4	46064	46237	12
4	46064	46238	599
4	46064	46243	1718
4	46065	46243	4
4	46066	46243	228
4	46072	46240	7
4	46072	46241	1057
4	46073	46234	7708
4	46074	46234	78
4	46074	46244	2
4	46074	46255	61
4	46074	46256	8017
4	46082	46246	1011
4	46082	46288	8
4	46082	46289	3781
4	46083	46246	9
[truncated: 10,340 more rows]
