# Supplementary material for: High-resolution mapping, characterization, and optimization of autonomously replicating sequences in yeast
Source: HighWire-hosted journal article supplement (doi:10.1101/gr.144659.112), 2012-12-12
Supplement: Supp_Table3.xlsx [file Supp_Table3.xlsx]

## Sheet: validation summary
Supplementary Table 3 - Summary of ARS validation results
chrom	start	end	length	function
1	6136	7136	1000	very_weak_function
1	7998	8548	550	very_weak_function
1	136900	137900	1000	non-functional
1	214879	215635	756	strong_function
1	222871	224037	1166	very_weak_function
1	226100	227000	900	non-functional
1	229378	229689	311	strong_function
2	152539	152907	368	non-functional
2	177529	177877	348	non-functional
2	208091	208340	249	non-functional
2	283015	283913	898	non-functional
2	378434	379194	760	non-functional
2	417382	418017	635	very_weak_function
2	440859	441697	838	very_weak_function
2	486627	486701	74	non-functional
2	486824	486884	60	weak_function
2	539137	539699	562	non-functional
2	621833	623240	1407	strong_function
2	631934	632246	312	weak_function
2	675947	676667	720	non-functional
2	707158	708262	1104	weak_function
2	720601	721038	437	non-functional
2	757390	757621	231	very_weak_function
2	773918	774348	430	non-functional
2	791774	791990	216	non-functional
2	792170	792262	92	strong_function
2	796259	797162	903	very_weak_function
2	802089	802674	585	strong_function
3	13802	15620	1818	strong_function
3	30199	30657	458	non-functional
3	74152	74681	529	strong_function
3	311462	311809	347	non-functional
4	736	2433	1697	strong_function
4	15492	15739	247	weak_function
4	21265	22262	997	non-functional
4	100380	101355	975	very_weak_function
4	235935	236184	249	strong_function
4	350835	351804	969	non-functional
4	452766	452885	119	non-functional
4	464709	466496	1787	non-functional
4	748332	748692	360	strong_function
4	903824	904655	831	non-functional
4	942983	943975	992	non-functional
4	951169	951307	138	non-functional
4	1033069	1034182	1113	non-functional
4	1159250	1159499	249	weak_function
4	1276212	1276440	228	strong_function
4	1404277	1404512	235	strong_function
4	1447471	1447503	32	weak_function
4	1486905	1487149	244	very_weak_function
4	1502145	1504025	1880	strong_function
5	4097	4185	88	non-functional
5	6377	6453	76	weak_function
5	8786	10019	1233	non-functional
5	70087	70198	111	non-functional
5	145676	145839	163	very_weak_function
5	192493	192926	433	non-functional
5	276127	276526	399	very_weak_function
5	278073	278355	282	weak_function
5	316195	317309	1114	strong_function
5	442412	442731	319	non-functional
5	489765	490089	324	non-functional
5	520767	521025	258	strong_function
6	12174	13028	854	very_weak_function
6	18682	19864	1182	very_weak_function
6	19001	19350	349	non-functional
6	19701	20000	299	non-functional
6	20701	20900	199	strong_function
6	68756	68859	103	strong_function
6	68824	68856	32	weak_function
6	86148	86477	329	non-functional
6	104456	104695	239	very_weak_function
6	127745	128066	321	weak_function
6	135979	136080	101	very_weak_function
6	216344	216692	348	very_weak_function
6	253316	253800	484	very_weak_function
7	693	757	64	strong_function
7	17720	18030	310	strong_function
7	55424	55926	502	non-functional
7	92735	92866	131	non-functional
7	117471	117955	484	very_weak_function
7	231909	231984	75	non-functional
7	250463	251273	810	non-functional
7	303700	303822	122	non-functional
7	313541	314182	641	non-functional
7	481343	481526	183	non-functional
7	568490	568738	248	weak_function
8	45739	45802	63	strong_function
8	66458	66657	199	non-functional
8	94759	95192	433	non-functional
8	140340	141265	925	very_weak_function
8	213179	213861	682	non-functional
8	297061	297181	120	strong_function
8	449847	450500	653	non-functional
9	79614	80860	1246	strong_function
9	162936	163302	366	non-functional
9	214620	214751	131	very_weak_function
9	214732	214764	32	non-functional
9	247701	247757	56	strong_function
9	309761	309996	235	non-functional
9	356951	358962	2011	strong_function
10	16123	16762	639	weak_function
10	53172	53361	189	non-functional
10	120652	121237	585	non-functional
10	248600	249300	700	non-functional
10	411589	412027	438	non-functional
10	454276	455248	972	weak_function
10	609000	609750	750	non-functional
10	612739	612796	57	strong_function
10	612741	612773	32	strong_function
10	622922	623129	207	non-functional
10	736728	736970	242	very_weak_function
11	154270	154496	226	non-functional
11	195249	196514	1265	strong_function
11	301898	302737	839	strong_function
11	456966	457051	85	non-functional
11	612011	612097	86	strong_function
11	665267	665425	158	non-functional
11	665563	665627	64	weak_function
12	31699	31778	79	strong_function
12	126266	127491	1225	non-functional
12	139564	139946	382	strong_function
12	150914	151421	507	weak_function
12	343577	344033	456	strong_function
12	702851	703060	209	non-functional
12	868023	868180	157	non-functional
12	1070543	1071694	1151	strong_function
13	158833	159008	175	non-functional
13	427744	427818	74	non-functional
13	468177	468468	291	strong_function
13	634068	634409	341	non-functional
13	649307	649551	244	strong_function
13	865288	865683	395	very_weak_function
13	897934	897985	51	strong_function
13	902283	902393	110	non-functional
14	61687	61741	54	strong_function
14	250378	251469	1091	strong_function
14	443296	443971	675	strong_function
14	629682	629831	149	non-functional
14	686525	686595	70	non-functional
14	732513	733070	557	non-functional
15	18201	19479	1278	strong_function
15	35549	36504	955	strong_function
15	128922	130182	1260	very_weak_function
15	154972	155462	490	non-functional
15	277641	278269	628	strong_function
15	347823	348623	800	weak_function
15	713811	714404	593	non-functional
15	729739	729969	230	weak_function
15	1047399	1047634	235	non-functional
16	5798	7700	1902	strong_function
16	12290	13227	937	strong_function
16	309145	309479	334	non-functional
16	317113	317611	498	strong_function
16	427652	427986	334	strong_function
16	453415	453520	105	non-functional
16	592318	592512	194	non-functional
16	598851	599101	250	non-functional
16	684395	684715	320	strong_function
16	932976	933223	247	weak_function
