# Supplementary material for: High-resolution mapping, characterization, and optimization of autonomously replicating sequences in yeast
Source: HighWire-hosted journal article supplement (doi:10.1101/gr.144659.112), 2012-12-12
Supplement: Supp_Table4.xlsx [file Supp_Table4.xlsx]

## Sheet: ndoARSs_arsseq_minis_ACS_ver.ta
Supplementary Table 4 - Combined ARS data
OriDB_ARS_name	OriDB_ARS_type	OriDB_chrom	OriDB_ARS_start	OriDB_ARS_end	ARSseq_contig_start	ARSseq_contig_end	ARSseq_core_start	ARSseq_core_end	miniARSseq_contig_start	miniARSseq_contig_end	miniARSseq_core_start	miniARSseq_core_end	ACS33_strand	ACS33_start	ACS33_end	ACS33_score	ACS17_strand	ACS17_start	ACS17_end	ACS17_score	verified_positive_start	verified_positive_end	verified_negative_start	verified_negative_end
ARS102	confirmed	1	650	1791	496	904	517	893	630	1244	706	776	r	734	766	14.4	r	750	766	13.4	-	-	-	-
ARS102.5	confirmed	1	6136	7136	-	-	-	-	-	-	-	-	r	6515	6547	8.42	f	6214	6230	5.72	6136	7136	-	-
ARS103	confirmed	1	7998	8548	-	-	-	-	-	-	-	-	r	8190	8222	8.11	-	-	-	-	7998	8548	-	-
ARS104	confirmed	1	30946	31184	30603	31609	30737	31472	-	-	-	-	f	31002	31034	11.2	f	31002	31018	11.8	-	-	-	-
ARS105	confirmed	1	40716	43300	41494	43060	41857	42233	41991	42152	41991	42151	f	42043	42075	9.27	r	42204	42220	7.8	-	-	-	-
ARS106	confirmed	1	70258	70491	69634	71027	69817	70817	70301	70472	70301	70471	r	70402	70434	6.89	r	70418	70434	9.04	-	-	-	-
	likely	1	98769	105769	-	-	-	-	-	-	-	-	f	104692	104724	5.69	f	105492	105508	5.01	-	-	-	-
ARS107	confirmed	1	124350	124599	124072	125283	124307	124626	124375	124613	124476	124542	r	124497	124529	11	r	124463	124479	8.23	-	-	-	-
ARS107.5	confirmed	1	136900	137900	-	-	-	-	-	-	-	-	f	137464	137496	6.39	f	137563	137579	5.5	-	-	136900	137900
ARS108	confirmed	1	146703	147690	147357	148026	147398	147718	-	-	-	-	r	147547	147579	8.23	r	147563	147579	6.98	-	-	-	-
ARS109	confirmed	1	159906	160127	159546	160929	159795	160012	-	-	-	-	f	159951	159983	10.7	f	159951	159967	10.6	-	-	-	-
ARS110	confirmed	1	176154	176402	175979	176452	175979	176452	-	-	-	-	f	176232	176264	10	f	176232	176248	8.93	-	-	-	-
	likely	1	202769	209769	-	-	-	-	-	-	-	-	r	208880	208912	7.48	f	208594	208610	6.7	-	-	-	-
ARS111	confirmed	1	214879	215635	-	-	-	-	-	-	-	-	r	214996	215028	11.3	r	215012	215028	11.6	214879	215635	-	-
ARS112	confirmed	1	222871	224037	-	-	-	-	-	-	-	-	r	223972	224004	6.31	r	223988	224004	7.33	222871	224037	-	-
ARS113	confirmed	1	226100	227000	-	-	-	-	-	-	-	-	r	226867	226899	9.05	r	226883	226899	7.07	-	-	226100	227000
ARS200	confirmed	2	39	686	65	360	65	360	14	243	39	202	f	78	110	12.3	f	78	94	10.3	-	-	-	-
ARS201	confirmed	2	6123	7127	6324	7256	6441	6941	6423	6854	6497	6620	r	6541	6573	14	r	6557	6573	12.8	-	-	-	-
ARS201.5	confirmed	2	28933	29152	27672	29312	28719	29138	-	-	-	-	f	28985	29017	10.9	f	28985	29001	8.99	-	-	-	-
ARS202	confirmed	2	63186	63421	63122	64599	63205	63481	63198	63393	63252	63375	r	63339	63371	12.5	r	63355	63371	7.37	-	-	-	-
ARS203	confirmed	2	93410	93811	93126	93798	93331	93641	93364	93553	93432	93517	r	93463	93495	7.58	r	93479	93495	7	-	-	-	-
	likely	2	95377	97400	-	-	-	-	-	-	-	-	r	97352	97384	7	-	-	-	-	-	-	-	-
	likely	2	99765	100829	-	-	-	-	-	-	-	-	-	-	-	-	-	-	-	-	-	-	-	-
ARS206	confirmed	2	142868	144016	142988	143988	143549	143757	143500	143731	143619	143707	r	143676	143708	9.33	r	143882	143898	5.31	-	-	-	-
ARS207	confirmed	2	170049	170298	169813	170371	170010	170333	170113	170274	170134	170241	r	170191	170223	9.92	r	170207	170223	8.27	-	-	-	-
ARS207.1	confirmed	2	177529	177877	-	-	-	-	-	-	-	-	r	177548	177580	5.58	f	177767	177783	5.81	-	-	177529	177877
ARS207.5	confirmed	2	198193	198434	197788	198609	197788	198609	198259	198463	198274	198435	r	198353	198385	8.29	r	198369	198385	9.05	-	-	-	-
ARS207.8	confirmed	2	209187	210063	-	-	-	-	-	-	-	-	r	209553	209585	5.6	r	209658	209674	5.82	-	-	-	-
ARS208	confirmed	2	237644	237879	237276	238010	237276	238010	237650	237962	237747	237861	r	237803	237835	10.8	r	237819	237835	9.46	-	-	-	-
ARS209	confirmed	2	254890	255136	254266	256081	254931	255213	254888	255110	254954	255040	r	255015	255047	12.2	r	255025	255041	11.7	-	-	-	-
	likely	2	258430	259601	-	-	-	-	-	-	-	-	-	-	-	-	-	-	-	-	-	-	-	-
ARS210.5	confirmed	2	283015	283913	-	-	-	-	-	-	-	-	f	283588	283620	9.34	f	283588	283604	5.58	-	-	283015	283913
ARS211	confirmed	2	326099	326335	325053	326528	325053	326528	-	-	-	-	f	326153	326185	11.2	f	326153	326169	8.37	-	-	-	-
ARS212	confirmed	2	378434	379194	-	-	-	-	-	-	-	-	f	379065	379097	11.6	f	379065	379081	9.93	-	-	378434	379194
ARS213	confirmed	2	389245	390368	-	-	-	-	-	-	-	-	r	389247	389279	4.94	r	389263	389279	7.98	-	-	-	-
ARS214	confirmed	2	407831	408064	407393	408543	407481	408032	407832	408128	407908	408024	r	407972	408004	9.43	r	407988	408004	11.7	-	-	-	-
ARS215	confirmed	2	417739	418035	-	-	-	-	-	-	-	-	f	417800	417832	7.09	f	417800	417816	5.66	417382	418017	-	-
ARS215.5	confirmed	2	440859	441697	-	-	-	-	-	-	-	-	r	440952	440984	7.51	f	441010	441026	7.71	440859	441697	-	-
	likely	2	477783	479267	-	-	-	-	-	-	-	-	-	-	-	-	r	479225	479241	5.05	-	-	-	-
ARS216	confirmed	2	486661	486909	486586	487163	486817	486886	486718	486982	486824	486884	r	486827	486859	11.9	r	486843	486859	11.3	486824	486884	486627	486701
	likely	2	503701	505102	-	-	-	-	-	-	-	-	r	504433	504465	8.08	r	504112	504128	8.35	-	-	-	-
ARS217	confirmed	2	516805	517805	517116	517412	517116	517412	517139	517341	517139	517341	r	517231	517263	10.5	r	517247	517263	9.41	-	-	-	-
ARS218	confirmed	2	539137	539699	-	-	-	-	-	-	-	-	r	539346	539378	8.85	r	539362	539378	8.75	-	-	539137	539699
ARS219	confirmed	2	591424	591713	590405	591707	590818	591615	-	-	-	-	f	591438	591470	6.15	f	591438	591454	5.54	-	-	-	-
ARS219.5	confirmed	2	611269	613200	-	-	-	-	-	-	-	-	r	612057	612089	8.76	r	612073	612089	9.24	-	-	-	-
ARS220	confirmed	2	622625	622894	621833	623240	621833	623240	-	-	-	-	r	622732	622764	9.44	f	622713	622729	7.35	621833	623240	-	-
ARS221	confirmed	2	631934	632246	-	-	-	-	-	-	-	-	f	632005	632037	10.2	f	632005	632021	9.35	631934	632246	-	-
ARS221.5	confirmed	2	675947	676667	-	-	-	-	-	-	-	-	f	676246	676278	9.77	f	676246	676262	10.4	-	-	675947	676667
ARS222	confirmed	2	704250	704521	704257	704719	704257	704719	-	-	-	-	f	704298	704330	8.22	f	704298	704314	7.43	-	-	-	-
ARS222.5	confirmed	2	707158	708262	-	-	-	-	-	-	-	-	r	707446	707478	8.14	r	708082	708098	7.14	707158	708262	-	-
ARS223	confirmed	2	720601	721038	-	-	-	-	-	-	-	-	r	720929	720961	7.24	-	-	-	-	-	-	720601	721038
ARS224	confirmed	2	741512	741802	740800	742400	741586	741837	741586	741801	741635	741752	r	741710	741742	11.8	r	741726	741742	11.9	-	-	-	-
ARS225	confirmed	2	757390	757621	-	-	-	-	-	-	-	-	f	757442	757474	8.41	f	757442	757458	7.66	757390	757621	-	-
	likely	2	760355	761713	-	-	-	-	-	-	-	-	f	760978	761010	8.63	f	760978	760994	9.1	-	-	-	-
ARS227	confirmed	2	773918	774348	-	-	-	-	-	-	-	-	r	773963	773995	7.33	r	773979	773995	7.15	-	-	773918	774348
ARS228	confirmed	2	792116	792340	791521	792489	792074	792300	792170	792262	792170	792262	f	792173	792205	5.79	f	792173	792189	7.4	792170	792262	-	-
ARS228.5	confirmed	2	796259	797162	-	-	-	-	-	-	-	-	f	796527	796559	7.2	f	796527	796543	8.12	796259	797162	-	-
ARS229	confirmed	2	801930	802617	801077	802818	802089	802674	-	-	-	-	f	802015	802047	9.37	f	802015	802031	8.03	802089	802674	-	-
ARS300	confirmed	3	837	1551	814	1296	814	1296	930	1169	988	1068	r	1031	1063	13.6	r	1047	1063	13.4	-	-	-	-
ARS301	confirmed	3	11145	11401	10493	11700	11199	11345	11177	11361	11238	11329	f	11254	11286	12.4	f	11254	11270	10	-	-	-	-
ARS302	confirmed	3	14574	14849	13802	15620	13802	15620	-	-	-	-	f	14698	14730	7.37	r	14671	14687	7.13	13802	15620	-	-
ARS303	confirmed	3	14870	15213	13802	15620	13802	15620	-	-	-	-	r	15167	15199	8.8	r	15183	15199	7.95	13802	15620	-	-
ARS320	confirmed	3	15213	16274	13802	15620	13802	15620	-	-	-	-	f	15295	15327	11.5	f	15295	15311	9.1	13802	15620	-	-
ARS304	confirmed	3	30199	30657	-	-	-	-	-	-	-	-	r	30296	30328	6.45	r	30312	30328	4.45	-	-	30199	30657
ARS305	confirmed	3	39158	39706	39401	40142	39507	39824	39504	39648	39507	39595	r	39560	39592	11.7	r	39576	39592	10.7	-	-	-	-
ARS306	confirmed	3	74457	74677	74152	74681	74152	74681	-	-	-	-	f	74518	74550	9.33	f	74518	74534	8.73	74152	74681	-	-
ARS307	confirmed	3	108775	109291	107625	109569	108722	109056	-	-	-	-	r	108937	108969	8.81	r	108953	108969	9.17	-	-	-	-
ARS308	confirmed	3	114314	114933	-	-	-	-	-	-	-	-	r	114434	114466	6.43	r	114450	114466	6.28	-	-	-	-
ARS309	confirmed	3	131978	132322	131693	132777	131693	132777	131941	132171	132036	132114	f	132037	132069	9.43	f	132037	132053	6.03	-	-	-	-
ARS310	confirmed	3	166494	167340	166487	166775	166630	166713	166537	166775	166630	166708	r	166673	166705	10.2	r	166689	166705	7.43	-	-	-	-
ARS313	confirmed	3	194256	194505	193821	195124	194214	194362	194214	194472	194299	194359	f	194302	194334	11.1	f	194302	194318	10.2	-	-	-	-
ARS314	confirmed	3	197369	197601	196871	199042	196871	199042	197451	197591	197451	197590	r	197520	197552	12.5	r	197536	197552	10.1	-	-	-	-
ARS314.5	confirmed	3	203875	207535	-	-	-	-	-	-	-	-	r	206365	206397	6.94	r	206804	206820	6.65	-	-	-	-
ARS315	confirmed	3	224807	225053	224444	225612	224672	225056	224790	224995	224843	224926	f	224853	224885	7.22	f	224853	224869	8.28	-	-	-	-
ARS316	confirmed	3	272844	273088	272565	274042	272863	273122	-	-	-	-	r	272992	273024	9.41	r	273008	273024	8.09	-	-	-	-
ARS317	confirmed	3	292524	292826	292440	292827	292496	292786	292525	292786	292630	292687	r	292648	292680	16	r	292664	292680	12	-	-	-	-
ARS318	confirmed	3	294396	295027	294483	295524	294711	294915	294711	295223	294812	294894	f	294814	294846	12.8	f	294814	294830	9.32	-	-	-	-
	likely	3	304363	311363	-	-	-	-	-	-	-	-	f	304633	304665	6.42	r	307779	307795	7.01	-	-	-	-
ARS319	confirmed	3	315346	316232	314712	316232	315768	315943	315713	315998	315799	315872	f	315811	315843	13.5	f	315811	315827	13.4	-	-	-	-
ARS400	confirmed	4	137	1392	736	2433	736	2433	-	-	-	-	r	837	869	13.4	r	853	869	13.4	736	2433	-	-
	likely	4	7596	11052	-	-	-	-	-	-	-	-	f	8590	8622	11.3	f	8590	8606	7.29	-	-	-	-
ARS403	confirmed	4	15492	15739	-	-	-	-	-	-	-	-	r	15650	15682	9.25	r	15666	15682	8.44	15492	15739	-	-
ARS402.5	confirmed	4	21265	22262	-	-	-	-	-	-	-	-	r	21730	21762	9.82	r	21746	21762	7.66	-	-	21265	22262
ARS404	confirmed	4	46181	46237	44684	46610	46048	46316	45986	46456	46185	46238	r	46198	46230	7.62	r	46214	46230	8.43	-	-	-	-
ARS405	confirmed	4	85945	86177	85364	86920	85642	86573	-	-	-	-	r	86093	86125	9.85	r	86109	86125	8.75	-	-	-	-
ARS405.5	confirmed	4	100380	101355	-	-	-	-	-	-	-	-	r	101226	101258	8.02	r	101242	101258	8.54	100380	101355	-	-
ARS406	confirmed	4	123617	123902	123363	124386	123424	123978	-	-	-	-	r	123763	123795	8.72	r	123779	123795	8.47	-	-	-	-
	likely	4	137003	138437	137330	138547	137471	137826	-	-	-	-	r	137647	137679	8.29	r	137663	137679	7.73	-	-	-	-
	likely	4	157458	158807	-	-	-	-	-	-	-	-	f	158649	158681	9.26	f	158649	158665	6.36	-	-	-	-
ARS409	confirmed	4	212420	212669	212307	213422	212517	213074	212505	212710	212519	212619	r	212562	212594	10.5	r	212578	212594	10.8	-	-	-	-
ARS409.5	confirmed	4	235935	236184	-	-	-	-	-	-	-	-	r	236034	236066	6.84	r	236050	236066	7.3	235935	236184	-	-
ARS410	confirmed	4	253789	254038	253187	254236	253744	253997	253740	254236	253836	253932	f	253839	253871	8.15	r	253932	253948	8.97	-	-	-	-
	likely	4	256029	257132	-	-	-	-	-	-	-	-	-	-	-	-	-	-	-	-	-	-	-	-
ARS412	confirmed	4	316719	317111	316769	317229	316769	317229	-	-	-	-	f	316862	316894	10.4	f	316862	316878	10.5	-	-	-	-
ARS413	confirmed	4	329564	329813	329229	329974	329229	329974	329655	329855	329673	329769	f	329671	329703	11.1	f	329671	329687	9.63	-	-	-	-
ARS413.5	confirmed	4	350835	351804	-	-	-	-	-	-	-	-	r	351125	351157	5.98	f	351188	351204	6.6	-	-	350835	351804
ARS414	confirmed	4	408070	408312	407548	409078	407898	408325	-	-	-	-	f	408130	408162	7.08	f	408130	408146	6.53	-	-	-	-
ARS415	confirmed	4	435056	435388	434323	435555	434966	435316	-	-	-	-	f	435160	435192	6.88	f	435160	435176	6.27	-	-	-	-
	likely	4	443318	444447	-	-	-	-	-	-	-	-	r	443367	443399	7.03	r	443383	443399	8.54	-	-	-	-
ARS416	confirmed	4	462430	462700	461696	462809	462370	462661	462446	462681	462562	462618	r	462573	462605	12.8	r	462589	462605	10.3	-	-	-	-
	likely	4	476003	477577	-	-	-	-	-	-	-	-	r	476440	476472	5.84	r	476456	476472	11.1	-	-	-	-
ARS417	confirmed	4	483846	484091	483577	484335	483985	484081	483926	484172	484000	484054	r	484003	484035	8.76	r	484019	484035	8.96	-	-	-	-
ARS417.5	confirmed	4	505336	505578	504677	506334	505226	505689	-	-	-	-	r	505485	505517	7.65	r	505501	505517	7.56	-	-	-	-
ARS418	confirmed	4	555224	555461	554614	556337	554745	555441	555194	555437	555234	555399	r	555365	555397	8.73	r	555381	555397	7.32	-	-	-	-
ARS419	confirmed	4	567490	567737	566307	568679	567545	567798	567504	567749	567604	567680	f	567580	567612	9.61	r	567661	567677	8.47	-	-	-	-
ARS420	confirmed	4	629072	629669	628930	629575	628930	629575	-	-	-	-	r	629293	629325	9.63	r	629309	629325	7.79	-	-	-	-
ARS421	confirmed	4	639859	640108	639520	640295	639949	640223	639949	640202	639998	640065	r	640030	640062	9.5	r	640046	640062	9.66	-	-	-	-
	likely	4	641291	648291	-	-	-	-	-	-	-	-	f	644294	644326	7.14	f	644294	644310	8.42	-	-	-	-
ARS422	confirmed	4	702879	703125	702230	703493	702849	703063	702822	703071	702922	702996	f	702924	702956	14	f	702924	702940	11.2	-	-	-	-
	likely	4	719873	721227	-	-	-	-	-	-	-	-	f	720904	720936	6.32	f	720904	720920	7.49	-	-	-	-
ARS422.5	confirmed	4	748384	748630	748332	748692	748332	748692	-	-	-	-	f	748456	748488	10.5	f	748456	748472	9.7	748332	748692	-	-
ARS423	confirmed	4	753159	753391	752394	754062	752923	753760	753213	753380	753234	753379	r	753301	753333	12.2	r	753317	753333	9.49	-	-	-	-
ARS425	confirmed	4	806044	806270	806041	806326	806041	806326	-	-	-	-	f	806099	806131	9.75	f	806099	806115	10.9	-	-	-	-
ARS426.5	confirmed	4	844597	845593	-	-	-	-	-	-	-	-	f	845286	845318	5.2	f	845286	845302	6.14	-	-	-	-
	likely	4	875791	882791	-	-	-	-	-	-	-	-	r	878168	878200	8.04	f	882375	882391	9.48	-	-	-	-
	likely	4	898253	899887	-	-	-	-	-	-	-	-	r	898434	898466	8.1	r	898811	898827	10.2	-	-	-	-
ARS427.5	confirmed	4	903824	904655	-	-	-	-	-	-	-	-	f	904202	904234	5.94	f	904202	904218	5.93	-	-	903824	904655
ARS428	confirmed	4	913780	914029	913666	914921	913717	914034	913771	914007	913845	913935	f	913856	913888	12.1	f	913856	913872	11.7	-	-	-	-
ARS429	confirmed	4	921682	921930	920991	922621	921676	922139	921731	921860	921734	921837	f	921736	921768	9.31	f	921736	921752	10.5	-	-	-	-
ARS429.5	confirmed	4	942983	943975	-	-	-	-	-	-	-	-	f	943847	943879	4.67	r	943551	943567	9.08	-	-	942983	943975
ARS430	confirmed	4	1016624	1016922	1016378	1017760	1016660	1016902	-	-	-	-	r	1016814	1016846	9.06	r	1016830	1016846	9.73	-	-	-	-
ARS430.5	confirmed	4	1033069	1034182	-	-	-	-	-	-	-	-	r	1033245	1033277	8.54	r	1033261	1033277	7.81	-	-	1033069	1034182
ARS431	confirmed	4	1057828	1058076	1056880	1058678	1057551	1058040	1057771	1057943	1057831	1057942	f	1057887	1057919	11.3	f	1057887	1057903	10	-	-	-	-
ARS431.5	confirmed	4	1109955	1110196	1109227	1110664	1109532	1110537	-	-	-	-	f	1110135	1110167	4.96	r	1110116	1110132	6.62	-	-	-	-
ARS432	confirmed	4	1159250	1159499	-	-	-	-	-	-	-	-	r	1159369	1159401	5.71	r	1159385	1159401	6.26	1159250	1159499	-	-
ARS432.5	confirmed	4	1165998	1166221	1165803	1166829	1166019	1166576	1166022	1166217	1166055	1166201	r	1166139	1166171	11.3	r	1166155	1166171	11.1	-	-	-	-
ARS433	confirmed	4	1240869	1241098	1240022	1242131	1240308	1241094	1240915	1241040	1240916	1241040	f	1240919	1240951	11	f	1240919	1240935	10.2	-	-	-	-
ARS434	confirmed	4	1276212	1276440	-	-	-	-	-	-	-	-	f	1276277	1276309	9.39	f	1276277	1276293	4.83	1276212	1276440	-	-
ARS435	confirmed	4	1302579	1302819	1302145	1303194	1302383	1302779	1302582	1302828	1302676	1302756	r	1302724	1302756	8.28	r	1302740	1302756	7.13	-	-	-	-
	likely	4	1305246	1306801	-	-	-	-	-	-	-	-	f	1305703	1305735	7.19	f	1305703	1305719	7.91	-	-	-	-
ARS437	confirmed	4	1353494	1353667	1353486	1354101	1353486	1354101	-	-	-	-	f	1353573	1353605	6.71	f	1353573	1353589	5.76	-	-	-	-
	likely	4	1355087	1356599	-	-	-	-	-	-	-	-	-	-	-	-	-	-	-	-	-	-	-	-
	likely	4	1379198	1380752	-	-	-	-	-	-	-	-	r	1379707	1379739	9.01	r	1379895	1379911	6.36	-	-	-	-
	likely	4	1381291	1388291	1384796	1385602	1384894	1385592	-	-	-	-	r	1385349	1385381	8.56	r	1385365	1385381	7.68	-	-	-	-
ARS440	confirmed	4	1404277	1404512	-	-	-	-	-	-	-	-	f	1404322	1404354	8.34	f	1404322	1404338	8.25	1404277	1404512	-	-
ARS441	confirmed	4	1447298	1448928	1446075	1448737	1447371	1447628	1447439	1447590	1447462	1447555	f	1447471	1447503	13.2	f	1447471	1447487	13.2	-	-	-	-
	likely	4	1454012	1455590	-	-	-	-	-	-	-	-	r	1454049	1454081	4.94	-	-	-	-	-	-	-	-
ARS442	confirmed	4	1461849	1462161	1461229	1462207	1461229	1462207	-	-	-	-	f	1462047	1462079	11.2	f	1462047	1462063	11.5	-	-	-	-
	likely	4	1468121	1469948	-	-	-	-	-	-	-	-	r	1469779	1469811	5.09	-	-	-	-	-	-	-	-
	likely	4	1469966	1471048	-	-	-	-	-	-	-	-	-	-	-	-	r	1470613	1470629	6.58	-	-	-	-
ARS446	confirmed	4	1486905	1487149	-	-	-	-	-	-	-	-	r	1487060	1487092	9.75	r	1487076	1487092	8.83	1486905	1487149	-	-
	likely	4	1495291	1502291	1502145	1504025	1502145	1504025	-	-	-	-	r	1495968	1496000	7.2	f	1498472	1498488	8.9	1502145	1504025	-	-
ARS447	confirmed	4	1502624	1503221	1502145	1504025	1502145	1504025	-	-	-	-	r	1502756	1502788	11.7	r	1502772	1502788	7.7	1502145	1504025	-	-
	likely	4	1505300	1507153	-	-	-	-	-	-	-	-	r	1505492	1505524	4.43	-	-	-	-	-	-	-	-
	likely	4	1522298	1526152	1523950	1524889	1524271	1524774	1524534	1524837	1524636	1524710	f	1524641	1524673	12.7	f	1524641	1524657	13.4	-	-	-	-
ARS502	confirmed	5	4097	4185	-	-	-	-	-	-	-	-	-	-	-	-	-	-	-	-	-	-	4097	4185
ARS503	confirmed	5	6464	7230	5844	6796	6238	6673	6245	6558	6377	6453	r	6963	6995	4.1	-	-	-	-	-	-	-	-
ARS504	confirmed	5	8786	10019	-	-	-	-	-	-	-	-	f	9667	9699	4.08	-	-	-	-	-	-	8786	10019
	likely	5	10425	12929	-	-	-	-	-	-	-	-	r	11918	11950	7.32	r	11033	11049	6.61	-	-	-	-
	likely	5	17067	19023	-	-	-	-	-	-	-	-	f	18453	18485	8.27	f	18453	18469	8.19	-	-	-	-
ARS507	confirmed	5	59282	59516	59084	59998	59122	59884	59277	59605	59337	59477	r	59438	59470	11	r	59454	59470	9.14	-	-	-	-
ARS508	confirmed	5	93977	94218	93402	94748	94052	94199	93997	94172	94057	94144	f	94055	94087	9.57	f	94055	94071	9.84	-	-	-	-
	likely	5	108553	110467	-	-	-	-	-	-	-	-	r	110137	110169	8.97	r	110153	110169	6.72	-	-	-	-
ARS510	confirmed	5	145539	145782	145071	146072	145676	145839	145559	145776	145604	145715	r	145682	145714	10.4	r	145698	145714	7.33	145676	145839	-	-
ARS511	confirmed	5	173636	173874	173183	174291	173671	173819	173697	173863	173698	173863	r	173776	173808	12.4	r	173792	173808	9.77	-	-	-	-
ARS511.5	confirmed	5	192493	192926	-	-	-	-	-	-	-	-	f	192693	192725	9.54	f	192693	192709	9.2	-	-	192493	192926
ARS512	confirmed	5	212381	212630	212091	213119	212091	213119	-	-	-	-	r	212429	212461	7.28	f	212454	212470	9.94	-	-	-	-
	likely	5	255623	256957	-	-	-	-	-	-	-	-	r	256250	256282	8.05	r	256266	256282	10.2	-	-	-	-
ARS513.5	confirmed	5	276127	276526	-	-	-	-	-	-	-	-	f	276362	276394	11	f	276362	276378	7.61	276127	276526	-	-
ARS513.7	confirmed	5	278073	278355	-	-	-	-	-	-	-	-	r	278145	278177	9.87	r	278161	278177	8.68	278073	278355	-	-
ARS514	confirmed	5	287504	287750	286720	287660	287474	287635	287443	287656	287549	287627	f	287565	287597	13.3	f	287565	287581	13.1	-	-	-	-
	likely	5	301213	302387	-	-	-	-	-	-	-	-	f	301677	301709	6.83	f	301677	301693	7.25	-	-	-	-
	likely	5	316043	317307	316195	317309	316195	317309	-	-	-	-	r	316595	316627	8.66	r	316611	316627	9.93	316195	317309	-	-
ARS516	confirmed	5	353504	353751	352874	354259	353507	353680	353510	353690	353573	353632	f	353582	353614	11.6	f	353582	353598	8.69	-	-	-	-
ARS517	confirmed	5	406747	406949	406114	407729	406801	407097	-	-	-	-	r	406871	406903	5.94	r	406887	406903	7.43	-	-	-	-
ARS518	confirmed	5	438929	439178	438921	439263	438921	439263	-	-	-	-	r	439070	439102	10.7	r	439086	439102	8.56	-	-	-	-
ARS519	confirmed	5	442412	442731	-	-	-	-	-	-	-	-	f	442500	442532	7.93	f	442500	442516	7.67	-	-	442412	442731
ARS520	confirmed	5	498417	499343	497871	500059	498878	499177	-	-	-	-	f	498884	498916	12.6	f	498884	498900	12.6	-	-	-	-
ARS521	confirmed	5	520767	521025	-	-	-	-	-	-	-	-	f	520869	520901	6.82	f	520869	520885	7.41	520767	521025	-	-
ARS522	confirmed	5	549560	549809	548788	550207	548991	549855	-	-	-	-	r	549650	549682	10.8	r	549666	549682	7.63	-	-	-	-
	likely	5	559886	566886	-	-	-	-	-	-	-	-	r	560061	560093	6.28	r	561439	561455	5.14	-	-	-	-
ARS523	confirmed	5	569020	570085	569221	571019	569504	569762	569486	569816	569612	569690	f	569629	569661	13.4	f	569629	569645	13.4	-	-	-	-
	likely	6	23	1527	-	-	-	-	-	-	-	-	-	-	-	-	-	-	-	-	-	-	-	-
ARS600.1	confirmed	6	5435	6155	5247	5730	5362	5625	5352	5576	5425	5529	r	5463	5495	13.4	r	5479	5495	13.4	-	-	-	-
ARS600.2	confirmed	6	12174	13028	-	-	-	-	-	-	-	-	r	12790	12822	7.14	r	12806	12822	10.6	12174	13028	-	-
ARS600.3	confirmed	6	18682	19864	-	-	-	-	-	-	-	-	r	19101	19133	7.42	f	19809	19825	6.81	18682, 18682	19864, 19864	19001, 19701	19350, 20000
ARS600.4	confirmed	6	19669	20826	20064	21845	20572	21205	20738	20923	20795	20869	f	19809	19841	5.66	f	20801	20817	7.27	18682, 20701	19864, 20900	19701, 19701	20000, 20000
ARS601	confirmed	6	32472	32995	-	-	-	-	-	-	-	-	r	32941	32973	11.8	r	32957	32973	10.8	-	-	-	-
ARS602	confirmed	6	32666	33247	-	-	-	-	-	-	-	-	r	32941	32973	11.8	r	32957	32973	10.8	-	-	-	-
ARS603	confirmed	6	68690	68869	67605	69282	68719	68908	68715	68912	68759	68856	f	68824	68856	10.9	r	68840	68856	9.27	68756	68859	-	-
ARS603.1	confirmed	6	104456	104695	-	-	-	-	-	-	-	-	f	104623	104655	5.29	f	104623	104639	6.06	104456	104695	-	-
ARS603.5	confirmed	6	118631	118952	117752	118882	117752	118882	-	-	-	-	f	118652	118684	5.66	f	118652	118668	5.87	-	-	-	-
ARS604	confirmed	6	127745	128066	-	-	-	-	-	-	-	-	f	127861	127893	11.1	f	127861	127877	11.3	127745	128066	-	-
ARS605	confirmed	6	135979	136080	-	-	-	-	-	-	-	-	r	136013	136045	11.4	r	136029	136045	9.95	135979	136080	-	-
ARS606	confirmed	6	167606	168041	167490	167998	167539	167794	-	-	-	-	r	167700	167732	11.1	r	167716	167732	7.8	-	-	-	-
ARS607	confirmed	6	199382	199493	199333	200294	199395	199549	199355	199497	199398	199494	f	199401	199433	10.8	f	199401	199417	11.3	-	-	-	-
ARS608	confirmed	6	216344	216692	-	-	-	-	-	-	-	-	f	216469	216501	7.95	f	216469	216485	9.5	216344	216692	-	-
ARS608.5	confirmed	6	253316	253800	-	-	-	-	-	-	-	-	r	253429	253461	7.69	r	253445	253461	4.63	253316	253800	-	-
ARS609	confirmed	6	256263	256418	255622	256469	256122	256457	256237	256467	256324	256398	r	256343	256375	12.1	r	256359	256375	8.78	-	-	-	-
ARS610	confirmed	6	269404	270022	268770	270076	269088	269968	-	-	-	-	f	269754	269786	11.8	f	269754	269770	10.7	-	-	-	-
	likely	7	6261	8789	-	-	-	-	-	-	-	-	r	7916	7948	8.26	r	7932	7948	8.55	-	-	-	-
	likely	7	15327	19624	17554	18235	17843	18064	17720	18030	17864	17932	r	18562	18594	8.26	r	18578	18594	8.42	17720	18030	-	-
	likely	7	22647	29647	-	-	-	-	-	-	-	-	f	28949	28981	9.06	f	25635	25651	7.54	-	-	-	-
	likely	7	31980	34434	-	-	-	-	-	-	-	-	r	34384	34416	7.85	f	32880	32896	6.55	-	-	-	-
ARS702	confirmed	7	64279	64528	63755	65025	64302	64591	64282	64522	64358	64463	r	64426	64458	11.6	r	64442	64458	11.2	-	-	-	-
	likely	7	68830	70170	-	-	-	-	-	-	-	-	f	69996	70028	4.17	-	-	-	-	-	-	-	-
ARS704	confirmed	7	112080	112319	111182	112374	111182	112374	-	-	-	-	f	112126	112158	9.38	f	112126	112142	7.99	-	-	-	-
	likely	7	114771	115990	-	-	-	-	-	-	-	-	r	114866	114898	7.17	r	114882	114898	5.63	-	-	-	-
ARS706	confirmed	7	117471	117955	-	-	-	-	-	-	-	-	r	117659	117691	7.66	r	117822	117838	7.9	117471	117955	-	-
ARS707	confirmed	7	163180	163447	162947	163554	163065	163418	163206	163390	163221	163322	f	163239	163271	10.9	f	163239	163255	8.64	-	-	-	-
	likely	7	165725	167856	-	-	-	-	-	-	-	-	r	166344	166376	5.02	f	167743	167759	7.98	-	-	-	-
	likely	7	170773	172017	-	-	-	-	-	-	-	-	f	171136	171168	6.99	f	171136	171152	9.18	-	-	-	-
	likely	7	186583	188207	-	-	-	-	-	-	-	-	r	187898	187930	4.53	r	187981	187997	5.86	-	-	-	-
ARS710	confirmed	7	203917	204159	203169	205002	203169	205002	-	-	-	-	f	203975	204007	6.94	f	203975	203991	8.33	-	-	-	-
ARS711	confirmed	7	231909	231984	-	-	-	-	-	-	-	-	f	231932	231964	6.39	f	231932	231948	6.55	-	-	231909	231984
	likely	7	240393	242127	240898	241399	240898	241399	-	-	-	-	f	241183	241215	8.82	f	241183	241199	9.53	-	-	-	-
	likely	7	268879	270680	-	-	-	-	-	-	-	-	f	269836	269868	6.58	f	268982	268998	6.52	-	-	-	-
ARS714	confirmed	7	285951	286246	285708	286294	285919	286108	285877	286150	285994	286085	f	286007	286039	11	f	286007	286023	9.58	-	-	-	-
	likely	7	287952	289013	-	-	-	-	-	-	-	-	r	287984	288016	6.28	r	288000	288016	5.99	-	-	-	-
ARS716	confirmed	7	352695	352917	352760	352907	352760	352907	-	-	-	-	r	352833	352865	12	r	352849	352865	10.9	-	-	-	-
ARS717	confirmed	7	388658	388892	388552	389227	388571	389112	-	-	-	-	r	388816	388848	9.77	r	388832	388848	8.08	-	-	-	-
ARS718	confirmed	7	421093	421342	420322	421647	420999	421515	421119	421378	421174	421283	r	421252	421284	9.69	r	421268	421284	9.18	-	-	-	-
	likely	7	479993	482537	-	-	-	-	-	-	-	-	-	-	-	-	-	-	-	-	-	-	481343	481526
ARS719	confirmed	7	484932	485160	483895	486912	484882	485157	484879	485158	485059	485112	r	485082	485114	13.6	r	485098	485114	11.1	-	-	-	-
ARS720	confirmed	7	508729	508978	508473	510247	508731	509169	508734	508907	508734	508907	r	508877	508909	11.7	r	508893	508909	9.96	-	-	-	-
	likely	7	552053	553847	-	-	-	-	-	-	-	-	f	552179	552211	5.72	f	552064	552080	5.16	-	-	-	-
ARS721	confirmed	7	568490	568738	-	-	-	-	-	-	-	-	r	568630	568662	7.55	r	568646	568662	8.62	568490	568738	-	-
ARS722	confirmed	7	574622	574916	574181	575150	574583	574920	574583	574853	574702	574765	f	574701	574733	11.6	f	574701	574717	10.7	-	-	-	-
	likely	7	574978	576840	574181	575150	574583	574920	-	-	-	-	-	-	-	-	r	575604	575620	6.23	-	-	-	-
	likely	7	580930	582707	-	-	-	-	-	-	-	-	r	582430	582462	4.18	r	582446	582462	6.43	-	-	-	-
	likely	7	652703	655047	653489	654244	653489	654244	-	-	-	-	r	653818	653850	5.84	r	653834	653850	7.7	-	-	-	-
ARS727	confirmed	7	659809	660054	658675	661193	659656	660101	659857	660042	659907	660003	r	659970	660002	13	r	659986	660002	10.5	-	-	-	-
ARS728	confirmed	7	715273	715556	714811	715781	714989	715463	715233	715475	715312	715378	f	715315	715347	13.7	f	715315	715331	11.4	-	-	-	-
ARS729	confirmed	7	777967	778216	777687	778329	777687	778329	-	-	-	-	f	778015	778047	9.49	r	778180	778196	8.26	-	-	-	-
ARS731	confirmed	7	834492	834736	833918	835373	834513	835031	-	-	-	-	r	834635	834667	6.86	r	834656	834672	4.56	-	-	-	-
	likely	7	882813	883747	-	-	-	-	-	-	-	-	-	-	-	-	-	-	-	-	-	-	-	-
ARS731.5	confirmed	7	888350	888599	887884	888647	888303	888605	888336	888547	888414	888495	f	888414	888446	12.6	f	888414	888430	11.5	-	-	-	-
	likely	7	916233	917857	-	-	-	-	-	-	-	-	f	916910	916942	5.91	f	916842	916858	5.82	-	-	-	-
ARS733	confirmed	7	977730	977979	977471	978149	977756	978037	-	-	-	-	r	977868	977900	7.64	f	977814	977830	6.83	-	-	-	-
ARS734	confirmed	7	999448	999695	998558	999919	999386	999634	999433	999595	999457	999578	f	999504	999536	9.49	f	999504	999520	9.51	-	-	-	-
	likely	7	1000998	1003052	-	-	-	-	-	-	-	-	f	1002289	1002321	5.76	f	1002375	1002391	5.27	-	-	-	-
	likely	7	1004198	1006102	-	-	-	-	-	-	-	-	r	1004582	1004614	6.56	f	1004475	1004491	6.42	-	-	-	-
	likely	7	1061998	1064852	1062308	1063708	1063243	1063664	1063390	1063581	1063390	1063581	f	1063504	1063536	9.25	f	1063504	1063520	9.79	-	-	-	-
ARS131a	confirmed	7	1082959	1084336	1083157	1085077	1083439	1083767	1083553	1083825	1083629	1083723	f	1083674	1083706	14	f	1083674	1083690	13.4	-	-	-	-
	likely	7	1089548	1090902	-	-	-	-	-	-	-	-	r	1090765	1090797	12.2	r	1090781	1090797	10.3	-	-	-	-
ARS131n	confirmed	8	5158	6168	5220	5704	5336	5599	5283	5582	5408	5503	r	5437	5469	13.4	r	5453	5469	13.4	-	-	-	-
ARS802	confirmed	8	7534	7782	7489	8365	7520	8018	7633	7827	7700	7766	r	7723	7755	13.3	r	7739	7755	12.3	-	-	-	-
	likely	8	9711	11566	-	-	-	-	-	-	-	-	r	9970	10002	4.33	r	10844	10860	4.66	-	-	-	-
	likely	8	45113	47112	45571	46643	45595	45936	45601	45973	45739	45802	r	45762	45794	10.8	r	45778	45794	8.04	45739	45802	-	-
	likely	8	56650	59172	-	-	-	-	-	-	-	-	f	59090	59122	7.7	f	59060	59076	7.96	-	-	-	-
ARS805	confirmed	8	64255	64489	63408	64906	63871	64554	64206	64435	64292	64368	f	64299	64331	9.87	f	64299	64315	9.93	-	-	-	-
ARS805.5	confirmed	8	94759	95192	-	-	-	-	-	-	-	-	f	94959	94991	11.8	f	94959	94975	8.63	-	-	94759	95192
	likely	8	110423	112247	-	-	-	-	-	-	-	-	r	111419	111451	6.6	r	111435	111451	7.2	-	-	-	-
	likely	8	115683	117257	-	-	-	-	-	-	-	-	r	116382	116414	6.24	r	116880	116896	5.3	-	-	-	-
ARS807	confirmed	8	133347	133591	133253	134176	133367	133620	133371	133590	133428	133530	r	133498	133530	13.5	r	133514	133530	12	-	-	-	-
	likely	8	134268	135517	-	-	-	-	-	-	-	-	-	-	-	-	-	-	-	-	-	-	-	-
ARS808	confirmed	8	140340	141265	-	-	-	-	-	-	-	-	r	140601	140633	6.46	r	140617	140633	6.45	140340	141265	-	-
ARS809	confirmed	8	168531	168773	168076	169101	168539	168714	-	-	-	-	r	168638	168670	10	r	168654	168670	7.46	-	-	-	-
ARS810	confirmed	8	213179	213861	-	-	-	-	-	-	-	-	f	213552	213584	6.1	r	213183	213199	6.34	-	-	213179	213861
	likely	8	214218	215683	-	-	-	-	-	-	-	-	f	215550	215582	6.1	r	214396	214412	6.73	-	-	-	-
	likely	8	218344	219498	-	-	-	-	-	-	-	-	-	-	-	-	-	-	-	-	-	-	-	-
ARS813	confirmed	8	245719	245968	244370	246706	245718	245878	245773	245848	245773	245848	f	245789	245821	9.95	f	245789	245805	10.9	-	-	-	-
ARS815	confirmed	8	296882	297475	296516	297821	297067	297388	297005	297229	297061	297181	r	297236	297268	8.43	r	297252	297268	5.4	297061	297181	-	-
	likely	8	358953	360647	-	-	-	-	-	-	-	-	r	359682	359714	10.4	r	359698	359714	8.55	-	-	-	-
	likely	8	363335	370335	-	-	-	-	-	-	-	-	f	365284	365316	6.51	f	365284	365300	6.01	-	-	-	-
	likely	8	380153	382157	-	-	-	-	-	-	-	-	f	380991	381023	8.88	f	380991	381007	7.4	-	-	-	-
ARS818	confirmed	8	392148	392391	391080	392974	392180	392396	-	-	-	-	r	392217	392249	11.2	r	392233	392249	10.2	-	-	-	-
ARS820	confirmed	8	447619	447853	447628	448313	447659	447859	447664	447859	447711	447793	r	447761	447793	14.4	r	447777	447793	11.4	-	-	-	-
	likely	8	451493	453397	-	-	-	-	-	-	-	-	-	-	-	-	f	452703	452719	5.83	-	-	-	-
	likely	8	474023	475267	-	-	-	-	-	-	-	-	r	474539	474571	7.44	r	474549	474565	6.52	-	-	-	-
ARS822	confirmed	8	501751	501992	501421	502400	501830	502300	-	-	-	-	r	501914	501946	9.06	r	501930	501946	7.03	-	-	-	-
	likely	8	504563	505207	-	-	-	-	-	-	-	-	-	-	-	-	-	-	-	-	-	-	-	-
ARS823	confirmed	8	520016	520630	519313	521029	519313	521029	-	-	-	-	r	520361	520393	9.3	r	520377	520393	8.51	-	-	-	-
ARS823.5	confirmed	8	535403	535836	-	-	-	-	-	-	-	-	r	535603	535635	11.3	r	535619	535635	11.6	-	-	-	-
	likely	8	550163	551317	-	-	-	-	-	-	-	-	r	550614	550646	6.31	r	550630	550646	7.33	-	-	-	-
ARS824	confirmed	8	555996	556327	555575	556385	555797	556268	556011	556286	556135	556197	f	556136	556168	12	f	556136	556152	12.6	-	-	-	-
	likely	9	6794	9748	7616	8436	7616	8436	-	-	-	-	r	7717	7749	12.7	r	7733	7749	13.4	-	-	-	-
	likely	9	15901	19066	-	-	-	-	-	-	-	-	f	16282	16314	7.44	f	16483	16499	7.52	-	-	-	-
	likely	9	30065	31646	-	-	-	-	-	-	-	-	f	30633	30665	8.53	f	30633	30649	5.85	-	-	-	-
	likely	9	32509	34859	32527	33856	33292	33626	33348	33567	33433	33514	r	33452	33484	8.03	r	33491	33507	6.61	-	-	-	-
ARS907	confirmed	9	73803	74220	73182	74482	73784	73993	73819	73991	73819	73991	r	73937	73969	6.56	r	74016	74032	6.09	-	-	-	-
	likely	9	79786	81344	79614	80860	79614	80860	-	-	-	-	r	80124	80156	9.02	r	80032	80048	8.27	79614	80860	-	-
ARS909	confirmed	9	105821	106048	105115	106271	105869	106053	-	-	-	-	r	105935	105967	11.8	r	105951	105967	7.99	-	-	-	-
ARS911	confirmed	9	136094	136335	135578	136869	135578	136869	-	-	-	-	r	136256	136288	7.27	r	136272	136288	9.43	-	-	-	-
ARS911.5	confirmed	9	162936	163302	-	-	-	-	-	-	-	-	r	163100	163132	7	r	163116	163132	7.34	-	-	162936	163302
ARS912	confirmed	9	175034	175355	175029	175459	175161	175398	175122	175354	175172	175259	f	175170	175202	9.84	f	175170	175186	10.7	-	-	-	-
	likely	9	179591	186591	-	-	-	-	-	-	-	-	r	181845	181877	7.27	f	183007	183023	7.25	-	-	-	-
	likely	9	189523	190747	-	-	-	-	-	-	-	-	r	189763	189795	11.1	r	189779	189795	9.3	-	-	-	-
	likely	9	201591	208591	-	-	-	-	-	-	-	-	f	203175	203207	7.93	r	204788	204804	7.45	-	-	-	-
ARS913	confirmed	9	214675	214826	214359	215727	214696	214931	214622	214748	214623	214748	f	214732	214764	9.57	f	214732	214748	11.5	214620	214751	-	-
	likely	9	216591	223591	-	-	-	-	-	-	-	-	f	223174	223206	10.3	f	223174	223190	8.6	-	-	-	-
ARS913.5	confirmed	9	245694	245932	244680	246766	245752	245922	-	-	-	-	r	245848	245880	15.2	r	245864	245880	11.2	-	-	-	-
ARS914	confirmed	9	247579	247800	247012	248856	247660	247888	247657	247881	247701	247757	r	247720	247752	13.2	r	247736	247752	11.6	247701	247757	-	-
	likely	9	247893	249347	247012	248856	247660	247888	-	-	-	-	f	248938	248970	6.4	f	248932	248948	7.12	-	-	-	-
	likely	9	307699	309073	-	-	-	-	-	-	-	-	f	307974	308006	5.11	f	307974	307990	7.23	-	-	-	-
ARS916	confirmed	9	310583	311070	310343	311173	310343	311173	-	-	-	-	r	310724	310756	6.1	r	310740	310756	7.44	-	-	-	-
	likely	9	313359	314533	-	-	-	-	-	-	-	-	f	313944	313976	5.36	-	-	-	-	-	-	-	-
	likely	9	320853	324347	-	-	-	-	-	-	-	-	r	322289	322321	6.57	r	323851	323867	6.62	-	-	-	-
ARS919	confirmed	9	341853	342096	340699	342623	341472	342108	341848	342165	341972	342042	r	341997	342029	9.73	r	342013	342029	11.4	-	-	-	-
ARS920	confirmed	9	357156	357393	356951	358962	356951	358962	-	-	-	-	f	357222	357254	7.22	f	357222	357238	11.7	356951	358962	-	-
	likely	9	362421	363718	-	-	-	-	-	-	-	-	f	363233	363265	4.58	f	363233	363249	5.52	-	-	-	-
	likely	9	405633	407617	-	-	-	-	-	-	-	-	f	406421	406453	7.79	f	406421	406437	10.7	-	-	-	-
ARS922	confirmed	9	411817	412053	411701	412589	411831	412194	411732	412100	411931	412008	r	411969	412001	10.3	r	411985	412001	12.2	-	-	-	-
	likely	9	431783	434257	-	-	-	-	-	-	-	-	f	432628	432660	8.35	f	432628	432644	8.64	-	-	-	-
	likely	9	437553	439847	438587	439369	439007	439276	438772	439256	439095	439169	f	439100	439132	14.5	f	439100	439116	13.4	-	-	-	-
ARS1001	confirmed	10	64	577	-	-	-	-	-	-	-	-	f	268	300	12.7	f	268	284	10.3	-	-	-	-
ARS1002	confirmed	10	7444	7943	7599	8419	7599	8419	-	-	-	-	r	7700	7732	12.7	r	7716	7732	13.4	-	-	-	-
ARS1003	confirmed	10	16123	16762	-	-	-	-	-	-	-	-	f	16265	16297	7.44	f	16466	16482	7.52	16123	16762	-	-
ARS1004	confirmed	10	23661	24158	23782	24435	23782	24435	-	-	-	-	f	23920	23952	11	f	23819	23835	8.84	-	-	-	-
ARS1005	confirmed	10	67467	67949	67318	68663	67482	68004	67552	67817	67661	67735	f	67663	67695	7.36	f	67663	67679	6.6	-	-	-	-
ARS1006	confirmed	10	99359	99796	98971	100182	99200	99734	99450	99671	99450	99671	r	99585	99617	12.1	r	99601	99617	12.7	-	-	-	-
ARS1007	confirmed	10	113226	113828	113186	115514	113628	113772	113537	113887	113671	113743	r	113712	113744	9.57	r	113728	113744	8.48	-	-	-	-
ARS1007.5	confirmed	10	161435	161860	160353	161851	160353	161851	-	-	-	-	f	161440	161472	7.5	f	161440	161456	7.78	-	-	-	-
	likely	10	167433	174433	-	-	-	-	-	-	-	-	f	173672	173704	8.5	r	172430	172446	7.72	-	-	-	-
ARS1008	confirmed	10	203729	204614	203010	204514	203882	204306	204161	204287	204161	204286	r	204209	204241	9.96	r	204225	204241	8.18	-	-	-	-
ARS1009	confirmed	10	228248	228740	227727	229324	227727	229324	-	-	-	-	r	228543	228575	9.75	r	228559	228575	8.97	-	-	-	-
ARS1009.5	confirmed	10	248600	249300	-	-	-	-	-	-	-	-	r	248646	248678	9.86	r	248662	248678	7.55	-	-	248600	249300
ARS1010	confirmed	10	298471	298952	298676	298941	298676	298941	-	-	-	-	r	298754	298786	5.18	f	298709	298725	4.49	-	-	-	-
	likely	10	301433	308433	-	-	-	-	-	-	-	-	f	302685	302717	6.57	f	301925	301941	6.63	-	-	-	-
ARS1011	confirmed	10	336976	337225	336475	337855	336720	337194	336954	337288	337046	337147	f	337048	337080	12.2	f	337048	337064	12.1	-	-	-	-
ARS1012	confirmed	10	374575	374818	374144	376006	374492	374797	374572	374796	374636	374724	f	374635	374667	9.79	f	374635	374651	7.79	-	-	-	-
ARS1013	confirmed	10	375401	375923	374144	376006	374492	374797	-	-	-	-	f	375605	375637	6.81	f	375611	375627	6.97	-	-	-	-
ARS1014	confirmed	10	416888	417134	416182	417797	416950	417179	416947	417184	417024	417094	r	417058	417090	11.7	r	417074	417090	12.2	-	-	-	-
ARS1015	confirmed	10	442248	442658	442014	442839	442287	442580	442268	442499	442359	442423	r	442392	442424	11.7	r	442408	442424	11.4	-	-	-	-
ARS1016	confirmed	10	454276	455248	-	-	-	-	-	-	-	-	r	455066	455098	6.68	r	455002	455018	6.84	454276	455248	-	-
ARS1017	confirmed	10	459029	459588	458455	459742	458455	459742	-	-	-	-	r	459418	459450	5.54	r	459434	459450	5.83	-	-	-	-
ARS1017.5	confirmed	10	501595	502525	-	-	-	-	-	-	-	-	r	502104	502136	7.9	r	501900	501916	4.72	-	-	-	-
ARS1018	confirmed	10	540239	540474	539821	540865	540084	540578	540084	540578	540298	540363	f	540302	540334	9.73	f	540302	540318	10.2	-	-	-	-
ARS1018.5	confirmed	10	609000	609750	-	-	-	-	-	-	-	-	f	609034	609066	8.65	f	609034	609050	7.41	-	-	609000	609750
ARS1019	confirmed	10	612542	612975	612577	612979	612577	612979	612654	612888	612742	612793	r	612741	612773	12.5	r	612757	612773	10.5	612739	612796	-	-
ARS1020	confirmed	10	654069	654309	653046	654502	653979	654256	-	-	-	-	r	654213	654245	11.2	r	654229	654245	11.4	-	-	-	-
ARS1021	confirmed	10	683328	683817	683043	684125	683594	683908	683578	683882	683703	683793	f	683706	683738	10.6	f	683706	683722	6.54	-	-	-	-
	likely	10	701663	702677	-	-	-	-	-	-	-	-	-	-	-	-	-	-	-	-	-	-	-	-
ARS1022	confirmed	10	711590	711837	710803	711988	710803	711988	-	-	-	-	f	711661	711693	8.28	f	711661	711677	9.67	-	-	-	-
ARS1023	confirmed	10	729677	730208	-	-	-	-	-	-	-	-	f	729813	729845	9.25	f	729813	729829	8.44	-	-	-	-
ARS1024	confirmed	10	736728	736970	-	-	-	-	-	-	-	-	r	736873	736905	11.3	r	736889	736905	7.29	736728	736970	-	-
ARS1025	confirmed	10	744102	744703	743063	744881	744503	744765	-	-	-	-	f	744632	744664	13.4	f	744632	744648	13.4	-	-	-	-
	likely	11	23	2746	506	1457	526	898	640	855	709	821	r	741	773	13.5	r	757	773	13.6	-	-	-	-
	likely	11	7397	9007	-	-	-	-	-	-	-	-	r	8294	8326	8.34	r	8310	8326	7.18	-	-	-	-
	likely	11	10002	17002	-	-	-	-	-	-	-	-	f	15938	15970	7.87	r	15864	15880	7.13	-	-	-	-
ARS1103	confirmed	11	55670	55917	55285	56319	55621	56095	55356	56039	55789	55866	r	55835	55867	9.62	r	55851	55867	9.78	-	-	-	-
ARS1104.5	confirmed	11	98329	98568	97731	98661	98340	98530	98322	98540	98364	98524	f	98385	98417	10.2	f	98385	98401	11.1	-	-	-	-
	likely	11	113073	115127	-	-	-	-	-	-	-	-	r	113801	113833	7.18	f	115077	115093	6.45	-	-	-	-
ARS1106	confirmed	11	152934	153173	151996	154496	153053	153517	152949	153230	153020	153136	r	153090	153122	10.4	r	153106	153122	8.53	-	-	-	-
ARS1106.3	confirmed	11	196038	196284	195249	196514	195249	196514	-	-	-	-	r	196182	196214	9.65	r	196198	196214	7.2	195249	196514	-	-
	likely	11	199613	200327	-	-	-	-	-	-	-	-	f	200212	200244	5.62	-	-	-	-	-	-	-	-
ARS1106.7	confirmed	11	213080	213385	212938	213630	213221	213486	-	-	-	-	r	213277	213309	12.2	r	213293	213309	9.42	-	-	-	-
	likely	11	256478	258327	256856	258306	257534	257658	257575	257733	257575	257732	f	257574	257606	5.22	-	-	-	-	-	-	-	-
	likely	11	301463	303017	301898	302737	301898	302737	-	-	-	-	f	302277	302309	9.8	f	302277	302293	10.3	301898	302737	-	-
	likely	11	326153	327067	-	-	-	-	-	-	-	-	-	-	-	-	-	-	-	-	-	-	-	-
ARS1109	confirmed	11	329322	329571	329121	329814	329137	329641	329331	329623	329434	329505	r	329468	329500	11.9	r	329484	329500	9.08	-	-	-	-
ARS1112	confirmed	11	388607	388902	388521	389376	388592	388798	388541	388821	388664	388725	f	388662	388694	12.5	f	388662	388678	9.73	-	-	-	-
ARS1113	confirmed	11	416822	417055	416733	417609	416733	417609	416785	417010	416879	416952	f	416878	416910	7.62	f	416878	416894	7.16	-	-	-	-
ARS1114	confirmed	11	447657	447892	446704	448487	446704	448487	-	-	-	-	r	447805	447837	11.5	r	447821	447837	10.5	-	-	-	-
ARS1114.5	confirmed	11	454453	459197	-	-	-	-	-	-	-	-	r	458115	458147	9.17	r	457168	457184	8.72	-	-	456966	457051
	likely	11	462033	463697	-	-	-	-	-	-	-	-	r	462614	462646	8.94	r	462630	462646	10.8	-	-	-	-
ARS1116	confirmed	11	516653	516902	516343	517897	516465	517088	516561	516859	516674	516738	f	516680	516712	10.9	f	516699	516715	9.32	-	-	-	-
	likely	11	519333	520547	-	-	-	-	-	-	-	-	f	520330	520362	6.09	f	520330	520346	6.38	-	-	-	-
	likely	11	528843	531477	-	-	-	-	-	-	-	-	r	530195	530227	6.24	f	531031	531047	8.47	-	-	-	-
ARS1118	confirmed	11	581468	581706	581205	582063	581234	581758	581367	581693	581497	581614	f	581532	581564	12.3	f	581532	581548	11.1	-	-	-	-
	likely	11	583883	585091	-	-	-	-	-	-	-	-	f	584121	584153	6.05	f	584121	584137	5.55	-	-	-	-
ARS1120	confirmed	11	611874	612107	611831	613538	611992	612480	611984	612235	612014	612094	r	612014	612046	9.55	r	612030	612046	7.42	612011	612097	-	-
	likely	11	616672	618133	-	-	-	-	-	-	-	-	-	-	-	-	r	618115	618131	5.53	-	-	-	-
	likely	11	632003	634377	633598	633974	633676	633913	-	-	-	-	r	633733	633765	8.65	r	633749	633765	9.46	-	-	-	-
ARS1123	confirmed	11	642355	642602	642036	642740	642297	642631	642297	642561	642404	642458	f	642412	642444	12.1	f	642412	642428	11.4	-	-	-	-
	likely	11	658278	666417	664721	665817	665191	665700	665432	665709	665563	665627	f	665568	665600	12.6	f	665568	665584	13.4	665563	665627	665267	665425
	likely	12	23	2077	219	594	219	594	-	-	-	-	f	281	313	12.2	f	281	297	10.3	-	-	-	-
	likely	12	5107	7993	-	-	-	-	-	-	-	-	f	5918	5950	12.2	f	5918	5934	10.3	-	-	-	-
	likely	12	10642	13971	11152	12734	11801	12664	11917	12132	11933	12060	r	12018	12050	12.3	r	12034	12050	12.8	-	-	-	-
	likely	12	28749	32505	31311	32014	31337	31849	31573	31843	31702	31775	f	31704	31736	10.5	f	31704	31720	9.38	31699	31778	-	-
	likely	12	51239	52929	-	-	-	-	-	-	-	-	r	52093	52125	9.5	r	52109	52125	11.4	-	-	-	-
	likely	12	70574	72392	-	-	-	-	-	-	-	-	r	70595	70627	5.86	r	70611	70627	6.77	-	-	-	-
	likely	12	75896	77618	76723	77002	76723	77002	-	-	-	-	r	76943	76975	5.74	f	76896	76912	4.8	-	-	-	-
ARS1206	confirmed	12	91417	91659	90615	92622	91462	91685	-	-	-	-	f	91466	91498	12	f	91466	91482	12.2	-	-	-	-
	likely	12	139293	140447	139564	139946	139564	139946	-	-	-	-	f	139703	139735	11.5	f	139703	139719	6.76	139564	139946	-	-
ARS1208	confirmed	12	150914	151421	-	-	-	-	-	-	-	-	r	151289	151321	10.7	f	151078	151094	8.87	150914	151421	-	-
ARS1209	confirmed	12	156646	156883	156354	156878	156354	156878	-	-	-	-	f	156700	156732	7.96	f	156700	156716	6	-	-	-	-
ARS1210	confirmed	12	222410	222792	221823	222738	222220	222677	-	-	-	-	r	222476	222508	8.63	r	222492	222508	6.2	-	-	-	-
ARS1211	confirmed	12	231179	231422	230444	232915	231187	231866	-	-	-	-	f	231250	231282	8.93	f	231250	231266	8.17	-	-	-	-
ARS1211.5	confirmed	12	243527	243960	243196	244941	243634	243967	243667	243883	243728	243835	f	243727	243759	15.7	f	243727	243743	12.5	-	-	-	-
	likely	12	278304	285304	-	-	-	-	-	-	-	-	f	279530	279562	6.56	f	279530	279546	6.48	-	-	-	-
ARS1212	confirmed	12	289220	289469	289188	289560	289277	289511	289261	289496	289315	289445	r	289390	289422	5.8	r	289406	289422	9.29	-	-	-	-
	likely	12	290304	297304	-	-	-	-	-	-	-	-	f	296521	296553	6.17	f	296485	296501	7.28	-	-	-	-
ARS1212.5	confirmed	12	343577	344033	-	-	-	-	-	-	-	-	f	343855	343887	4.93	f	343855	343871	8.17	343577	344033	-	-
ARS1213	confirmed	12	373156	373400	372861	374365	372995	373384	373078	373387	373254	373333	r	373297	373329	10.1	r	373313	373329	7.08	-	-	-	-
ARS1215	confirmed	12	412668	412897	412213	413409	412686	412894	-	-	-	-	r	412822	412854	13.3	r	412838	412854	7.89	-	-	-	-
ARS1216	confirmed	12	450485	450726	450406	451611	450406	451611	-	-	-	-	f	450506	450538	11.2	f	450506	450522	8.73	-	-	-	-
ARS1216.5	confirmed	12	458826	459141	458468	459973	458468	459973	-	-	-	-	r	459060	459092	11.6	r	459076	459092	10.8	-	-	-	-
ARS1217	confirmed	12	512868	513117	511729	514340	512863	513366	512905	513134	512983	513085	r	513054	513086	10.7	r	513070	513086	10.2	-	-	-	-
	likely	12	595804	602804	601836	603392	602934	603146	-	-	-	-	r	598870	598902	6.14	f	599999	600015	7.14	-	-	-	-
ARS1218	confirmed	12	602938	603155	601836	603392	602934	603146	602917	603197	603023	603132	r	603078	603110	10.6	r	603094	603110	9.89	-	-	-	-
	likely	12	606423	607627	-	-	-	-	-	-	-	-	f	607218	607250	4.6	-	-	-	-	-	-	-	-
	likely	12	622103	623937	622724	623216	622724	623216	-	-	-	-	f	622843	622875	10.4	f	622843	622859	9.11	-	-	-	-
	likely	12	637013	639757	-	-	-	-	-	-	-	-	-	-	-	-	-	-	-	-	-	-	-	-
	likely	12	644493	645767	-	-	-	-	-	-	-	-	r	645139	645171	6.98	r	645155	645171	6.55	-	-	-	-
ARS1220	confirmed	12	659823	660072	659393	660314	659778	659959	659782	660072	659883	659935	f	659892	659924	11.8	f	659892	659908	8.77	-	-	-	-
	likely	12	729123	732237	729559	731020	730472	730981	-	-	-	-	f	730524	730556	6.92	r	730806	730822	6.11	-	-	-	-
ARS1223	confirmed	12	744942	745179	744590	746295	744590	746295	-	-	-	-	r	745084	745116	8.37	r	745100	745116	10.5	-	-	-	-
	likely	12	748375	749534	-	-	-	-	-	-	-	-	-	-	-	-	f	748938	748954	4.63	-	-	-	-
	likely	12	768982	771133	-	-	-	-	-	-	-	-	f	771018	771050	7.56	f	771018	771034	6.77	-	-	-	-
	likely	12	785588	786917	-	-	-	-	-	-	-	-	r	786328	786360	5.61	r	786344	786360	7.89	-	-	-	-
ARS1226	confirmed	12	794020	794269	793473	794498	793806	794411	794080	794234	794099	794231	r	794176	794208	10.9	r	794192	794208	11	-	-	-	-
	likely	12	821403	823002	821277	823079	821523	822888	822015	822211	822016	822211	f	822089	822121	6.98	f	822349	822365	6.66	-	-	-	-
ARS1227.5	confirmed	12	888569	888810	888163	889035	888471	888784	888587	888769	888665	888741	r	888709	888741	11.5	r	888725	888741	11	-	-	-	-
	likely	12	927043	929292	927467	929140	927699	928930	-	-	-	-	f	928285	928317	10.2	f	928285	928301	7.41	-	-	-	-
	likely	12	930388	931561	-	-	-	-	-	-	-	-	r	930991	931023	4.67	r	931007	931023	5.05	-	-	-	-
	likely	12	947123	949407	-	-	-	-	-	-	-	-	f	948037	948069	8.8	f	947630	947646	7.07	-	-	-	-
ARS1232	confirmed	12	1007180	1007470	1006903	1007337	1006903	1007337	-	-	-	-	f	1007235	1007267	11.4	f	1007235	1007251	10.7	-	-	-	-
ARS1233	confirmed	12	1013789	1014017	1013520	1014116	1013653	1014106	-	-	-	-	r	1013829	1013861	6.32	r	1013845	1013861	8.36	-	-	-	-
	likely	12	1016304	1023304	1023296	1024870	1023649	1024371	-	-	-	-	f	1022403	1022435	6.12	f	1019132	1019148	9.38	-	-	-	-
ARS1234	confirmed	12	1023967	1024207	1023296	1024870	1023649	1024371	1024020	1024182	1024020	1024181	r	1024120	1024152	10.4	r	1024136	1024152	7.25	-	-	-	-
	likely	12	1042798	1043952	-	-	-	-	-	-	-	-	r	1043581	1043613	8.5	r	1043597	1043613	9.22	-	-	-	-
	likely	12	1052304	1059304	1059302	1059919	1059434	1059919	-	-	-	-	r	1059109	1059141	7.28	f	1059032	1059048	6.04	-	-	-	-
ARS1235	confirmed	12	1059486	1059919	1059302	1059919	1059434	1059919	-	-	-	-	r	1059686	1059718	11.5	r	1059702	1059718	9.67	-	-	-	-
	likely	12	1062398	1065752	1063624	1065232	1064185	1064445	1064225	1065159	1064283	1064369	f	1064312	1064344	13.5	f	1064312	1064328	13.4	-	-	-	-
	likely	12	1070198	1071952	1070543	1071694	1070543	1071694	-	-	-	-	r	1071401	1071433	12.2	r	1071417	1071433	10.3	1070543	1071694	-	-
	likely	13	23	1261	-	-	-	-	-	-	-	-	f	259	291	12.2	f	259	275	10.3	-	-	-	-
	likely	13	4983	7702	-	-	-	-	-	-	-	-	r	6277	6309	13.4	r	6293	6309	13.4	-	-	-	-
	likely	13	8791	10699	-	-	-	-	-	-	-	-	f	9580	9612	4.91	f	9580	9596	5.98	-	-	-	-
ARS1303	confirmed	13	31687	31935	31097	32395	31615	32059	31654	31904	31765	31835	f	31766	31798	9.31	f	31766	31782	6.85	-	-	-	-
ARS1304	confirmed	13	39922	40355	39779	40395	39779	40395	-	-	-	-	r	40122	40154	9.39	r	40133	40149	9.58	-	-	-	-
	likely	13	44666	45681	-	-	-	-	-	-	-	-	f	44859	44891	6.68	f	44859	44875	6.67	-	-	-	-
ARS1305	confirmed	13	94216	94463	93941	94862	94250	94603	-	-	-	-	r	94359	94391	7.64	r	94375	94391	7.73	-	-	-	-
	likely	13	111844	113013	-	-	-	-	-	-	-	-	f	112445	112477	5.46	r	112418	112434	5.24	-	-	-	-
ARS1307	confirmed	13	137299	137548	136936	137694	137132	137598	-	-	-	-	f	137321	137353	11.4	f	137321	137337	12.7	-	-	-	-
ARS1307.5	confirmed	13	158846	159279	158185	159540	158886	159277	-	-	-	-	f	159046	159078	12	f	159046	159062	9.96	-	-	158833	159008
ARS1308	confirmed	13	183793	184037	183100	184058	183731	183924	183731	183929	183796	183887	r	183842	183874	10.5	r	183858	183874	8.38	-	-	-	-
	likely	13	227023	227487	-	-	-	-	-	-	-	-	-	-	-	-	-	-	-	-	-	-	-	-
ARS1309	confirmed	13	263062	263296	262219	264108	262219	264108	-	-	-	-	f	263126	263158	7.6	f	263126	263142	10.3	-	-	-	-
	likely	13	268223	269987	-	-	-	-	-	-	-	-	f	268936	268968	5.44	f	269606	269622	5.76	-	-	-	-
ARS1310	confirmed	13	286782	287067	285971	287851	286830	287010	286768	286977	286833	286950	r	286914	286946	9.66	f	286845	286861	7.9	-	-	-	-
	likely	13	289203	290548	-	-	-	-	-	-	-	-	r	290343	290375	8.21	r	290359	290375	8.79	-	-	-	-
ARS1312	confirmed	13	370976	371221	370760	371270	370800	371177	370926	371196	370999	371104	f	371019	371051	10.2	f	371019	371035	10.1	-	-	-	-
	likely	13	372017	373196	-	-	-	-	-	-	-	-	f	372834	372866	6	f	372859	372875	6	-	-	-	-
	likely	13	431453	433827	432265	434240	432265	434240	-	-	-	-	r	432184	432216	6.4	f	433014	433030	5.95	-	-	-	-
ARS1316	confirmed	13	468177	468468	-	-	-	-	-	-	-	-	f	468236	468268	9.05	f	468236	468252	9.16	468177	468468	-	-
	likely	13	477105	478800	-	-	-	-	-	-	-	-	-	-	-	-	f	477607	477623	5.36	-	-	-	-
	likely	13	480233	483637	-	-	-	-	-	-	-	-	r	480500	480532	7.78	r	480516	480532	6.69	-	-	-	-
ARS1319	confirmed	13	503346	504087	502775	503904	503125	503844	-	-	-	-	r	503611	503643	8.48	r	503581	503597	7.57	-	-	-	-
ARS1320	confirmed	13	535595	535843	535428	536614	535469	536209	-	-	-	-	r	535738	535770	13.8	r	535754	535770	12.5	-	-	-	-
ARS1322	confirmed	13	554392	554750	554127	555003	554388	554666	554422	554754	554542	554618	r	554582	554614	9.48	r	554598	554614	6.95	-	-	-	-
ARS1323	confirmed	13	611273	611488	610841	612240	611177	611462	-	-	-	-	f	611317	611349	11.7	f	611317	611333	9.97	-	-	-	-
ARS1324	confirmed	13	634479	634714	633628	634930	634068	634617	634378	634689	634499	634587	f	634520	634552	8.14	f	634520	634536	6.29	-	-	-	-
ARS1325	confirmed	13	649307	649551	-	-	-	-	-	-	-	-	f	649361	649393	12.5	f	649361	649377	10.5	649307	649551	-	-
	likely	13	687903	689917	688728	689279	688728	689279	-	-	-	-	r	688943	688975	5.99	r	688990	689006	5.78	-	-	-	-
	likely	13	723574	730574	-	-	-	-	-	-	-	-	f	725658	725690	5.54	f	729620	729636	6.21	-	-	-	-
ARS1327	confirmed	13	758222	758470	758183	759124	758285	758607	-	-	-	-	r	758385	758417	8.85	r	758401	758417	8.7	-	-	-	-
	likely	13	759074	766074	758183	759124	758285	758607	-	-	-	-	r	759161	759193	7.88	r	759177	759193	9.48	-	-	-	-
ARS1328	confirmed	13	772629	772878	771930	773082	771930	773082	-	-	-	-	f	772676	772708	4.8	-	-	-	-	-	-	-	-
ARS1329	confirmed	13	805116	805338	804027	806055	805154	805270	805151	805282	805151	805282	f	805162	805194	11.9	f	805162	805178	8.4	-	-	-	-
ARS1330	confirmed	13	815341	815567	814923	815832	815117	815759	-	-	-	-	f	815391	815423	12.2	f	815391	815407	8.64	-	-	-	-
	likely	13	836823	838167	-	-	-	-	-	-	-	-	r	837489	837521	10.2	r	837505	837521	8.12	-	-	-	-
ARS1331.5	confirmed	13	865288	865683	-	-	-	-	-	-	-	-	f	865627	865659	6.26	f	865456	865472	7.39	865288	865683	-	-
	likely	13	877553	879907	877933	879318	878664	879037	-	-	-	-	f	878720	878752	9.1	f	878720	878736	9.4	-	-	-	-
ARS1332	confirmed	13	897804	898040	897357	898883	897768	898258	897799	898112	897934	897985	r	897945	897977	10.2	r	897961	897977	9.93	897934	897985	-	-
	likely	13	918073	919137	-	-	-	-	-	-	-	-	-	-	-	-	-	-	-	-	-	-	-	-
	likely	13	922023	924397	922361	923822	922941	923706	923433	923722	923564	923632	f	923574	923606	11.4	f	923574	923590	13.2	-	-	-	-
	likely	14	50	2241	-	-	-	-	-	-	-	-	f	169	201	12.2	f	169	185	10.3	-	-	-	-
	likely	14	6282	10914	7260	8961	7260	8961	7144	7474	7336	7427	r	7361	7393	13.4	r	7377	7393	13.4	-	-	-	-
	likely	14	13998	16375	-	-	-	-	-	-	-	-	r	14693	14725	7.14	r	14709	14725	10.6	-	-	-	-
ARS1405	confirmed	14	28467	28699	27837	28788	27837	28788	-	-	-	-	r	28622	28654	9.1	r	28638	28654	9.91	-	-	-	-
ARS1406	confirmed	14	61597	61894	61617	61829	61617	61829	61614	61829	61687	61741	r	61825	61857	10.4	f	61694	61710	10.7	61687	61741	-	-
ARS1407	confirmed	14	89528	89802	89459	90452	89566	89830	89459	90232	89681	89751	r	89702	89734	10.1	r	89739	89755	11.5	-	-	-	-
	likely	14	125623	127807	126266	127491	126266	127491	-	-	-	-	r	126763	126795	10.3	r	126779	126795	6.22	-	-	-	-
ARS1411	confirmed	14	169566	169804	169301	169949	169339	169752	169600	169755	169673	169752	r	169716	169748	10	r	169732	169748	11.5	-	-	-	-
ARS1412	confirmed	14	196055	196291	195802	196714	196076	196352	196038	196327	196132	196231	r	196193	196225	9.86	r	196209	196225	7.41	-	-	-	-
ARS1413	confirmed	14	250259	250506	-	-	-	-	-	-	-	-	r	250461	250493	7.14	r	250477	250493	6.41	250378	251469	-	-
	likely	14	252383	254147	-	-	-	-	-	-	-	-	-	-	-	-	-	-	-	-	-	-	-	-
ARS1414	confirmed	14	279875	280108	279226	280667	279778	280114	279933	280140	279977	280067	r	280031	280063	9.78	r	280047	280063	8.64	-	-	-	-
ARS1415	confirmed	14	321917	322210	321058	322338	321598	322240	-	-	-	-	f	322000	322032	10.9	f	322000	322016	11.2	-	-	-	-
	likely	14	324551	325764	-	-	-	-	-	-	-	-	r	325088	325120	4.38	-	-	-	-	-	-	-	-
	likely	14	342963	344117	-	-	-	-	-	-	-	-	r	343551	343583	10.1	r	343150	343166	8.79	-	-	-	-
	likely	14	348469	355469	352074	353830	352494	352942	-	-	-	-	f	352769	352801	8.47	f	352687	352703	7.18	-	-	-	-
ARS1417	confirmed	14	412263	412493	411917	412717	411917	412717	-	-	-	-	r	412407	412439	6.25	r	412423	412439	5.01	-	-	-	-
	likely	14	415780	417439	-	-	-	-	-	-	-	-	r	415839	415871	5.54	r	415799	415815	5.09	-	-	-	-
ARS1419	confirmed	14	449343	449588	448256	449883	449182	449643	449425	449585	449425	449585	r	449502	449534	11.5	r	449518	449534	8.74	-	-	-	-
ARS1420	confirmed	14	498987	499232	498838	499394	498838	499394	498964	499153	498966	499151	f	499037	499069	8.06	f	499037	499053	8.75	-	-	-	-
	likely	14	512969	519969	-	-	-	-	-	-	-	-	f	516878	516910	8.33	r	516788	516804	6.42	-	-	-	-
ARS1421	confirmed	14	545966	546201	545542	546374	546025	546238	545994	546208	546067	546166	r	546114	546146	11	r	546130	546146	10.9	-	-	-	-
ARS1422	confirmed	14	561106	561384	559776	561737	561019	561677	-	-	-	-	r	561295	561327	9.58	r	561311	561327	9.9	-	-	-	-
	likely	14	567715	569020	-	-	-	-	-	-	-	-	f	567821	567853	4.21	-	-	-	-	-	-	-	-
ARS1424	confirmed	14	609458	609706	609269	609781	609463	609725	609325	609661	609515	609603	f	609532	609564	10.9	f	609532	609548	10	-	-	-	-
	likely	14	615807	617621	-	-	-	-	-	-	-	-	-	-	-	-	-	-	-	-	-	-	-	-
ARS1426	confirmed	14	635660	635901	635265	636081	635265	636081	635741	635908	635815	635890	r	635799	635831	10.3	r	635815	635831	9.61	-	-	-	-
ARS1427	confirmed	14	691482	691727	691140	692778	691375	691733	-	-	-	-	r	691646	691678	6.81	r	691662	691678	9.54	-	-	-	-
	likely	14	712633	714697	-	-	-	-	-	-	-	-	f	713942	713974	7	f	713942	713958	6.21	-	-	-	-
	likely	14	737003	740237	738308	739206	738560	739092	738683	738888	738698	738808	f	738714	738746	9.43	r	738788	738804	7.64	-	-	-	-
	likely	14	763353	765237	763828	764964	764166	764456	764278	764423	764278	764422	r	764321	764353	8.49	r	764337	764353	6.95	-	-	-	-
	likely	14	769969	776969	-	-	-	-	-	-	-	-	f	770026	770058	6.53	f	776344	776360	7.39	-	-	-	-
	likely	14	781453	784287	782624	783557	782694	783441	-	-	-	-	f	783308	783340	12.3	f	783308	783324	12.8	-	-	-	-
	likely	15	23	2646	342	1216	680	938	661	1106	751	826	r	780	812	13.5	r	796	812	13.4	-	-	-	-
	likely	15	9761	12672	10715	11618	10715	11618	-	-	-	-	f	10926	10958	8.95	f	10926	10942	10.4	-	-	-	-
	likely	15	18367	20227	18201	19479	18201	19479	-	-	-	-	r	19297	19329	6.87	r	19273	19289	6.6	18201	19479	-	-
	likely	15	22523	24675	-	-	-	-	-	-	-	-	-	-	-	-	-	-	-	-	-	-	-	-
ARS1506.5	confirmed	15	35667	35903	35549	36504	35549	36504	-	-	-	-	f	35713	35745	9.92	f	35713	35729	8.13	35549	36504	-	-
ARS1507	confirmed	15	72636	72872	72252	73211	72657	72902	72544	72890	72681	72752	f	72687	72719	11.7	f	72687	72703	9.76	-	-	-	-
ARS1508	confirmed	15	85195	85444	84775	85993	85268	85474	84775	85498	85268	85360	r	85328	85360	10.4	r	85344	85360	10.6	-	-	-	-
	likely	15	103253	104167	-	-	-	-	-	-	-	-	f	103667	103699	5.69	f	103667	103683	9.64	-	-	-	-
ARS1509	confirmed	15	113843	114084	113811	115462	113845	114705	113841	114058	113883	113982	f	113894	113926	9.84	f	113894	113910	8.47	-	-	-	-
ARS1509.3	confirmed	15	128922	130182	-	-	-	-	-	-	-	-	f	129027	129059	6.68	r	129297	129313	8.83	128922	130182	-	-
ARS1509.5	confirmed	15	154972	155462	-	-	-	-	-	-	-	-	r	155243	155275	9.04	r	155259	155275	6.91	-	-	154972	155462
ARS1510	confirmed	15	166974	167220	166628	167157	166628	167157	-	-	-	-	f	167002	167034	11.9	f	167002	167018	9.92	-	-	-	-
ARS1510.5	confirmed	15	227481	228117	226860	228313	226860	228313	-	-	-	-	r	227576	227608	6.57	f	227543	227559	5.17	-	-	-	-
ARS1511	confirmed	15	277529	277778	277641	278269	277641	278269	-	-	-	-	r	277701	277733	11.1	r	277717	277733	8.75	277641	278269	-	-
	likely	15	308463	310157	308992	309268	308992	309268	-	-	-	-	r	309233	309265	7.15	f	310064	310080	7.12	-	-	-	-
	likely	15	331493	332707	-	-	-	-	-	-	-	-	r	331896	331928	5.11	r	332018	332034	5.71	-	-	-	-
ARS1513	confirmed	15	337279	337528	337196	337951	337266	337548	337343	337623	337423	337491	r	337452	337484	11.7	r	337468	337484	6.93	-	-	-	-
	likely	15	353743	354887	-	-	-	-	-	-	-	-	f	354608	354640	10.8	f	354641	354657	6.85	-	-	-	-
ARS1513.5	confirmed	15	436732	436966	436572	437249	436629	436952	436724	436919	436782	436868	r	436837	436869	9.8	r	436853	436869	9.02	-	-	-	-
	likely	15	444823	446117	-	-	-	-	-	-	-	-	f	445913	445945	6.27	f	445913	445929	8.26	-	-	-	-
	likely	15	458023	459327	-	-	-	-	-	-	-	-	r	458682	458714	5.35	r	458698	458714	7.36	-	-	-	-
	likely	15	463698	464877	-	-	-	-	-	-	-	-	f	464196	464228	5.95	f	464196	464212	5.83	-	-	-	-
ARS1514	confirmed	15	489645	490129	489290	490409	489683	489943	-	-	-	-	f	489891	489923	9.65	f	489891	489907	11	-	-	-	-
	likely	15	493968	495625	-	-	-	-	-	-	-	-	-	-	-	-	f	495049	495065	4.68	-	-	-	-
	likely	15	496203	498207	497039	497494	497039	497494	-	-	-	-	r	497385	497417	8.03	f	497383	497399	6.08	-	-	-	-
	likely	15	520113	521217	-	-	-	-	-	-	-	-	r	520944	520976	5.37	r	520960	520976	6.85	-	-	-	-
ARS1516	confirmed	15	566409	566643	565373	567263	566246	567109	-	-	-	-	r	566566	566598	9.03	r	566582	566598	6.63	-	-	-	-
ARS1517	confirmed	15	600885	600960	600523	600964	600778	600941	600830	600941	600842	600939	r	600906	600938	6.4	-	-	-	-	-	-	-	-
	likely	15	601221	608221	-	-	-	-	-	-	-	-	f	605336	605368	6.91	f	603658	603674	8.18	-	-	-	-
	likely	15	616913	618427	-	-	-	-	-	-	-	-	r	618252	618284	8.12	r	617861	617877	6.54	-	-	-	-
ARS1519	confirmed	15	656632	656876	656454	657089	656612	656778	656609	656864	656700	656772	f	656701	656733	8.45	f	656701	656717	7.94	-	-	-	-
	likely	15	662888	663957	-	-	-	-	-	-	-	-	f	663645	663677	6.84	f	663645	663661	7.89	-	-	-	-
	likely	15	680823	683197	680670	682295	680818	681550	-	-	-	-	r	681334	681366	10.3	r	681350	681366	7.95	-	-	-	-
ARS1521	confirmed	15	729739	729969	-	-	-	-	-	-	-	-	f	729795	729827	9.88	f	729795	729811	10.7	729739	729969	-	-
	likely	15	733221	740221	-	-	-	-	-	-	-	-	f	739572	739604	5.82	r	739840	739856	6.41	-	-	-	-
	likely	15	759221	766221	-	-	-	-	-	-	-	-	f	760627	760659	8.92	f	760627	760643	9.26	-	-	-	-
ARS1523	confirmed	15	766617	766862	766333	767592	766672	766843	766604	766788	766604	766788	f	766689	766721	8.13	f	766689	766705	7.92	-	-	-	-
ARS1524	confirmed	15	783344	783563	782274	783840	782800	783818	-	-	-	-	f	783386	783418	11.2	f	783386	783402	8.36	-	-	-	-
	likely	15	854173	856027	854042	855686	854665	855070	-	-	-	-	f	854839	854871	6.33	f	854839	854855	8.71	-	-	-	-
ARS1526	confirmed	15	874190	874434	872878	874886	873939	874561	874244	874459	874247	874409	r	874337	874369	7.41	r	874352	874368	5.43	-	-	-	-
	likely	15	898603	900567	-	-	-	-	-	-	-	-	f	899699	899731	10	f	899699	899715	11.5	-	-	-	-
	likely	15	901383	903147	-	-	-	-	-	-	-	-	r	902414	902446	6.17	f	901561	901577	6.13	-	-	-	-
ARS1528	confirmed	15	908288	908537	908011	909861	908160	908454	908198	908457	908305	908381	f	908306	908338	13.2	f	908306	908322	12.9	-	-	-	-
ARS1529	confirmed	15	981454	981690	980754	982817	980754	982817	-	-	-	-	f	981504	981536	7.87	f	981504	981520	7.28	-	-	-	-
ARS1529.5	confirmed	15	1053490	1053901	1052425	1054030	1052425	1054030	-	-	-	-	f	1053692	1053724	10.6	f	1053692	1053708	10	-	-	-	-
	likely	15	1056048	1059952	-	-	-	-	-	-	-	-	r	1059494	1059526	7.15	r	1057241	1057257	7.6	-	-	-	-
	likely	15	1071098	1072802	-	-	-	-	-	-	-	-	r	1071711	1071743	6	r	1071727	1071743	6.17	-	-	-	-
	likely	15	1077498	1085252	1083439	1085336	1083439	1085336	-	-	-	-	f	1083951	1083983	12.9	f	1083951	1083967	13.5	-	-	-	-
	likely	15	1089998	1091252	-	-	-	-	-	-	-	-	r	1091027	1091059	12.2	r	1091043	1091059	10.3	-	-	-	-
ARS1601	confirmed	16	6778	8439	5798	7700	5798	7700	-	-	-	-	r	7156	7188	12.9	r	7172	7188	13.5	5798	7700	-	-
ARS1602	confirmed	16	12290	13227	-	-	-	-	-	-	-	-	r	12986	13018	9.68	r	13002	13018	7.55	12290	13227	-	-
	likely	16	18202	19681	-	-	-	-	-	-	-	-	f	19123	19155	6	f	19123	19139	6.17	-	-	-	-
ARS1604	confirmed	16	42976	43212	42653	43429	42736	43271	-	-	-	-	r	43131	43163	12.4	r	43147	43163	10.2	-	-	-	-
ARS1605	confirmed	16	73038	73283	73012	73658	73012	73658	73031	73227	73031	73227	r	73173	73205	8.95	r	73189	73205	5.97	-	-	-	-
	likely	16	89758	92975	-	-	-	-	-	-	-	-	r	90484	90516	8.59	r	90500	90516	8.97	-	-	-	-
ARS1607	confirmed	16	116505	116765	116048	117297	116500	116741	116538	116688	116565	116680	f	116593	116625	12.3	f	116593	116609	13.1	-	-	-	-
	likely	16	161693	163447	162258	163160	162258	163160	-	-	-	-	f	162471	162503	9.47	f	162140	162156	4.6	-	-	-	-
	likely	16	178643	179827	-	-	-	-	-	-	-	-	r	179051	179083	5.5	r	179067	179083	4.9	-	-	-	-
	likely	16	189963	191457	-	-	-	-	-	-	-	-	r	191292	191324	8.63	r	190590	190606	7.13	-	-	-	-
	likely	16	194903	196097	-	-	-	-	-	-	-	-	f	195260	195292	5.55	f	195266	195282	5.52	-	-	-	-
ARS1609	confirmed	16	210467	211723	209986	210882	209986	210882	-	-	-	-	r	210789	210821	11.2	r	210805	210821	9.94	-	-	-	-
	likely	16	214486	216511	-	-	-	-	-	-	-	-	-	-	-	-	r	215882	215898	4.56	-	-	-	-
	likely	16	261168	262687	261270	261985	261470	261750	261387	261617	261476	261582	r	261520	261552	6.77	r	261536	261552	4.73	-	-	-	-
ARS1614	confirmed	16	289483	289704	287887	290366	289463	289867	-	-	-	-	f	289530	289562	11.3	f	289530	289546	9.08	-	-	-	-
	likely	16	303433	305027	-	-	-	-	-	-	-	-	f	304074	304106	7.02	f	304074	304090	8.29	-	-	-	-
	likely	16	316743	318397	317113	317611	317113	317611	-	-	-	-	r	317536	317568	8.44	f	318107	318123	8.26	317113	317611	-	-
	likely	16	331043	332607	-	-	-	-	-	-	-	-	f	331784	331816	8.83	f	331784	331800	6.53	-	-	-	-
	likely	16	376723	377937	-	-	-	-	-	-	-	-	f	377160	377192	5.13	f	377160	377176	5.97	-	-	-	-
ARS1618	confirmed	16	384536	384784	384356	385151	384536	384733	384544	384723	384590	384682	f	384592	384624	11	f	384592	384608	9.5	-	-	-	-
ARS1618.5	confirmed	16	414032	416072	-	-	-	-	-	-	-	-	r	415657	415689	6.08	f	415464	415480	7	-	-	-	-
ARS1619	confirmed	16	418132	418359	418093	418930	418115	418483	418110	418318	418177	418285	f	418178	418210	9.76	f	418178	418194	8.97	-	-	-	-
	likely	16	422281	423380	-	-	-	-	-	-	-	-	-	-	-	-	-	-	-	-	-	-	-	-
	likely	16	439113	441372	-	-	-	-	-	-	-	-	f	441205	441237	10.7	f	439440	439456	10.7	-	-	-	-
	likely	16	453658	454627	-	-	-	-	-	-	-	-	f	454095	454127	9.02	f	454095	454111	8.49	-	-	-	-
ARS1620.5	confirmed	16	456557	456805	456573	457267	456573	457267	-	-	-	-	r	456727	456759	11.2	r	456743	456759	6.83	-	-	-	-
ARS1621	confirmed	16	511619	511940	511605	512261	511631	511789	-	-	-	-	f	511704	511736	12.3	f	511704	511720	8.85	-	-	-	-
	likely	16	552403	554287	-	-	-	-	-	-	-	-	r	553465	553497	7.21	r	553481	553497	9.76	-	-	-	-
	likely	16	556133	563133	562996	565162	563687	564055	-	-	-	-	r	560002	560034	7.65	r	560018	560034	6.86	-	-	-	-
ARS1622	confirmed	16	563822	564061	562996	565162	563687	564055	563752	564017	563846	563962	f	563877	563909	7.86	f	563877	563893	8.58	-	-	-	-
ARS1622.5	confirmed	16	565046	565289	562996	565162	563687	564055	-	-	-	-	f	565115	565147	7.69	f	565115	565131	9.93	-	-	-	-
	likely	16	583493	585147	-	-	-	-	-	-	-	-	r	584380	584412	10.4	r	584396	584412	9.11	-	-	-	-
	likely	16	588613	589437	-	-	-	-	-	-	-	-	-	-	-	-	-	-	-	-	-	-	-	-
ARS1623	confirmed	16	633868	634117	633345	634569	633663	634173	633813	634113	633916	634019	f	633921	633953	8.43	f	633921	633937	8.09	-	-	-	-
ARS1624	confirmed	16	684383	684632	684395	684715	684395	684715	-	-	-	-	f	684405	684437	9.32	f	684405	684421	8.48	684395	684715	-	-
	likely	16	687133	694133	-	-	-	-	-	-	-	-	f	688846	688878	6.25	f	688846	688862	4.88	-	-	-	-
ARS1625	confirmed	16	695432	695681	694758	696041	695071	695500	695336	695656	695455	695569	f	695465	695497	13.4	f	695465	695481	9.94	-	-	-	-
ARS1626	confirmed	16	749094	749341	748586	750214	748895	749238	-	-	-	-	f	749117	749149	10.7	f	749117	749133	10.3	-	-	-	-
ARS1626.5	confirmed	16	776921	777152	776042	777924	776585	777252	777015	777236	777079	777199	r	777063	777095	11.3	r	777079	777095	10.2	-	-	-	-
ARS1627	confirmed	16	819153	819393	819000	819532	819153	819390	-	-	-	-	r	819308	819340	12.5	r	819324	819340	9.23	-	-	-	-
	likely	16	822993	825387	-	-	-	-	-	-	-	-	r	824946	824978	5.83	r	824962	824978	7.54	-	-	-	-
ARS1628	confirmed	16	842646	842894	842380	843175	842380	843175	-	-	-	-	r	842844	842876	7.26	f	842708	842724	8.79	-	-	-	-
	likely	16	850007	851124	-	-	-	-	-	-	-	-	r	850164	850196	6	r	850155	850171	6	-	-	-	-
ARS1630	confirmed	16	880854	881102	880492	881408	880834	881091	880806	881046	880898	881009	f	880905	880937	13.1	f	880905	880921	12.4	-	-	-	-
ARS1631	confirmed	16	932976	933223	-	-	-	-	-	-	-	-	r	933133	933165	10.9	r	933149	933165	11.2	932976	933223	-	-
	likely	16	940923	943157	941044	943235	942187	942645	-	-	-	-	f	942425	942457	12.6	f	942425	942441	13.1	-	-	-	-
	likely	16	946803	947997	-	-	-	-	-	-	-	-	r	947865	947897	12.2	r	947881	947897	10.3	-	-	-	-
